# Supplementary material for: Synthesis and structural characterization of pincer type bicyclic diacyloxy- and diazaselenuranes
Source: Royal Society of Chemistry journal article supplement (doi:10.1039/c1dt10862j), 2011-01-01
Supplement: c1dt10862j.pdf [file c1dt10862j.pdf]

## Electronic Supplementary Information For

### Synthesis and structural characterization of pincer type bicyclic diacyloxy- and diazaselenuranes

K. Selvakumar<sup>a</sup>, Harkesh B. Singh<sup>a\*</sup>, Nidhi Goel<sup>b</sup>, Udai P. Singh<sup>b</sup>, Ray J. Butcher<sup>c</sup>

<sup>a</sup>Department of Chemistry, Indian Institute of Technology Bombay, Powai,  
Mumbai - 400076, India

<sup>b</sup>Department of Chemistry, Indian Institute of Technology Roorkee ,  
Roorkee - 247667, India

<sup>c</sup>Department of Chemistry, Howard University, Washington, D.C 20059, USA

Email; [chhsia@chem.iitb.ac.in](mailto:chhsia@chem.iitb.ac.in)

#### Contents

|                                                                    |              |
|--------------------------------------------------------------------|--------------|
| <b>S1. Spectral Data</b>                                           | <b>2-45</b>  |
| <b>S2. GPx-Like activity of 25, 27, 29, 30, 31, 37 and 47</b>      | <b>46-48</b> |
| <b>S3. Cyclic Voltammogram of 25, 27, 29, 30, 31 37, 38 and 47</b> | <b>49-57</b> |
| <b>S4. Optimized structures and their coordinates</b>              | <b>58-69</b> |

## S1. Spectral Data

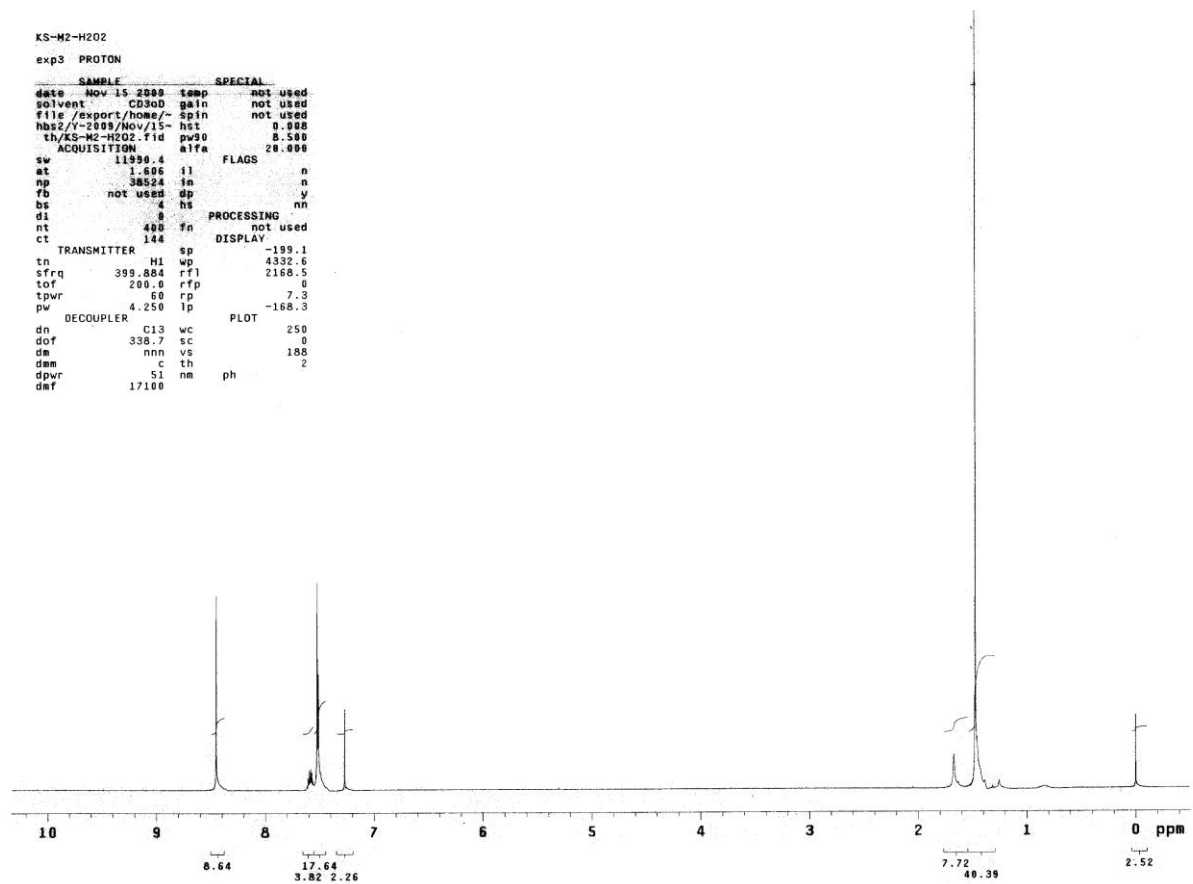

Fig. S1  $^1\text{H}$  NMR spectrum of **25**

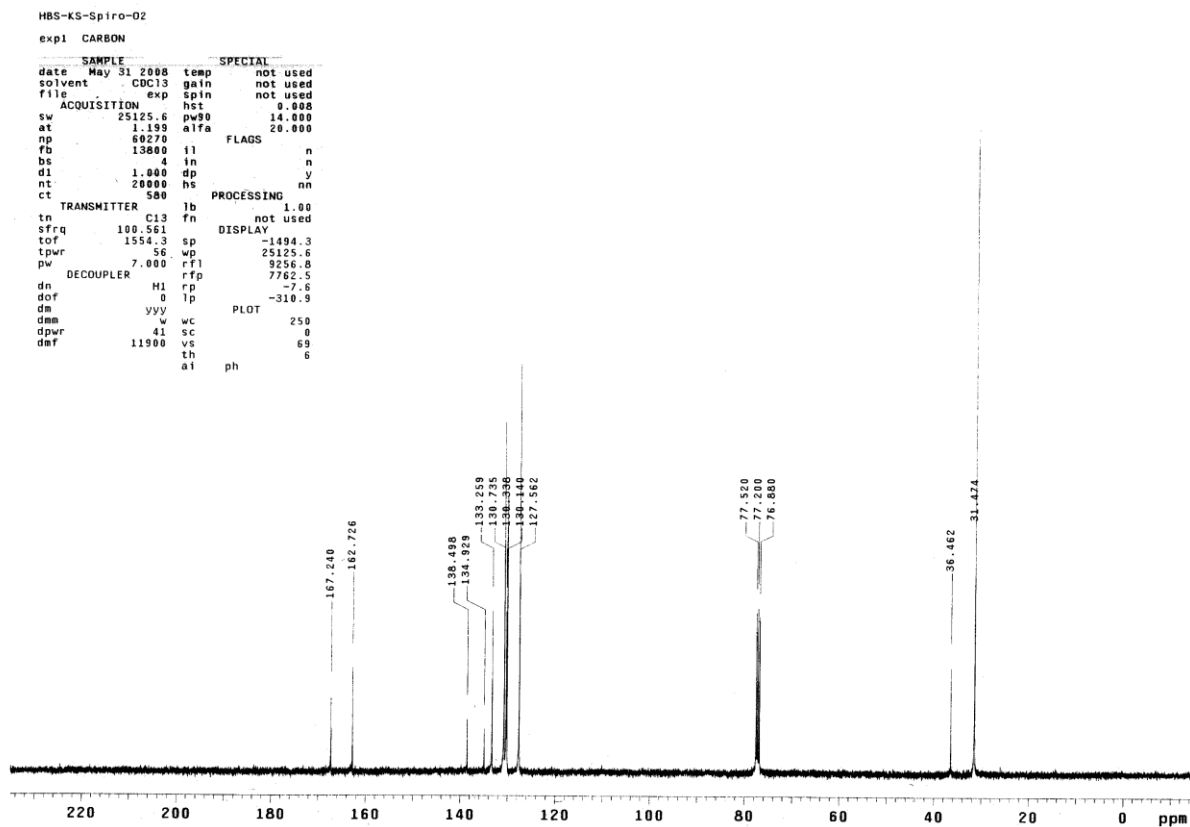

Fig. S2  $^{13}\text{C}$  NMR spectrum of 25

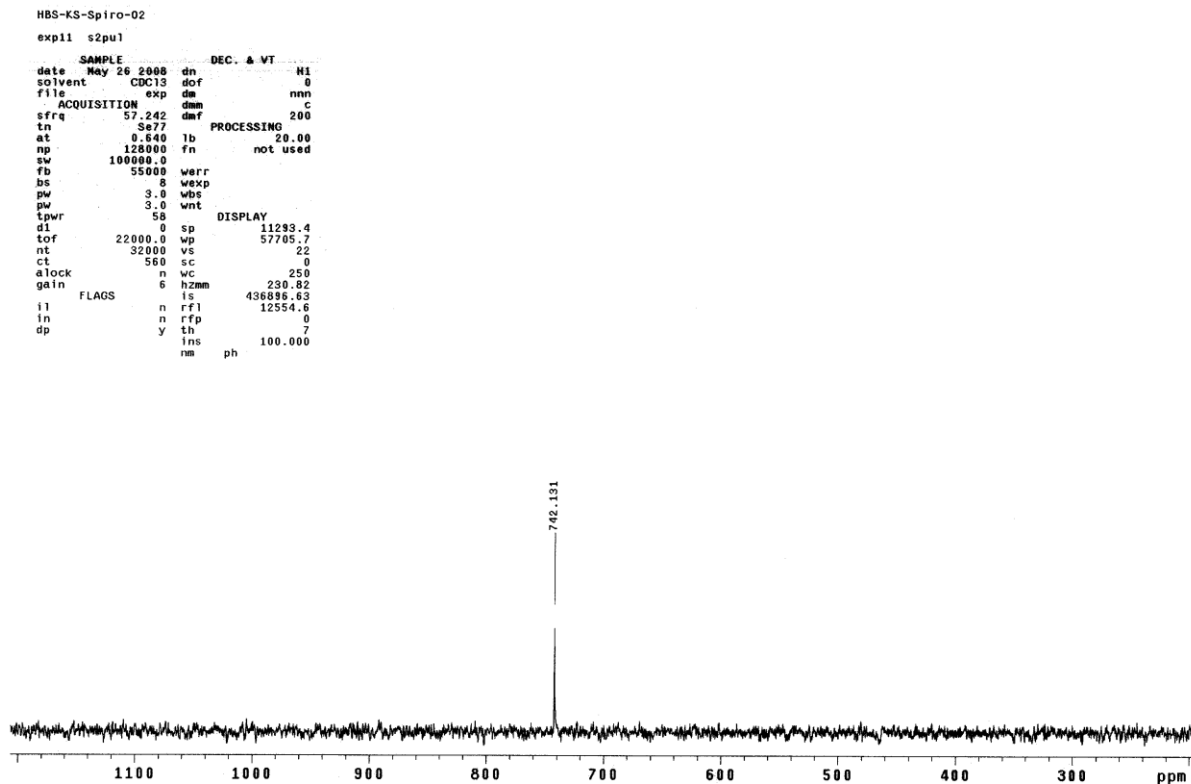

Fig. S3  $^{77}\text{Se}$  NMR spectrum of **25**

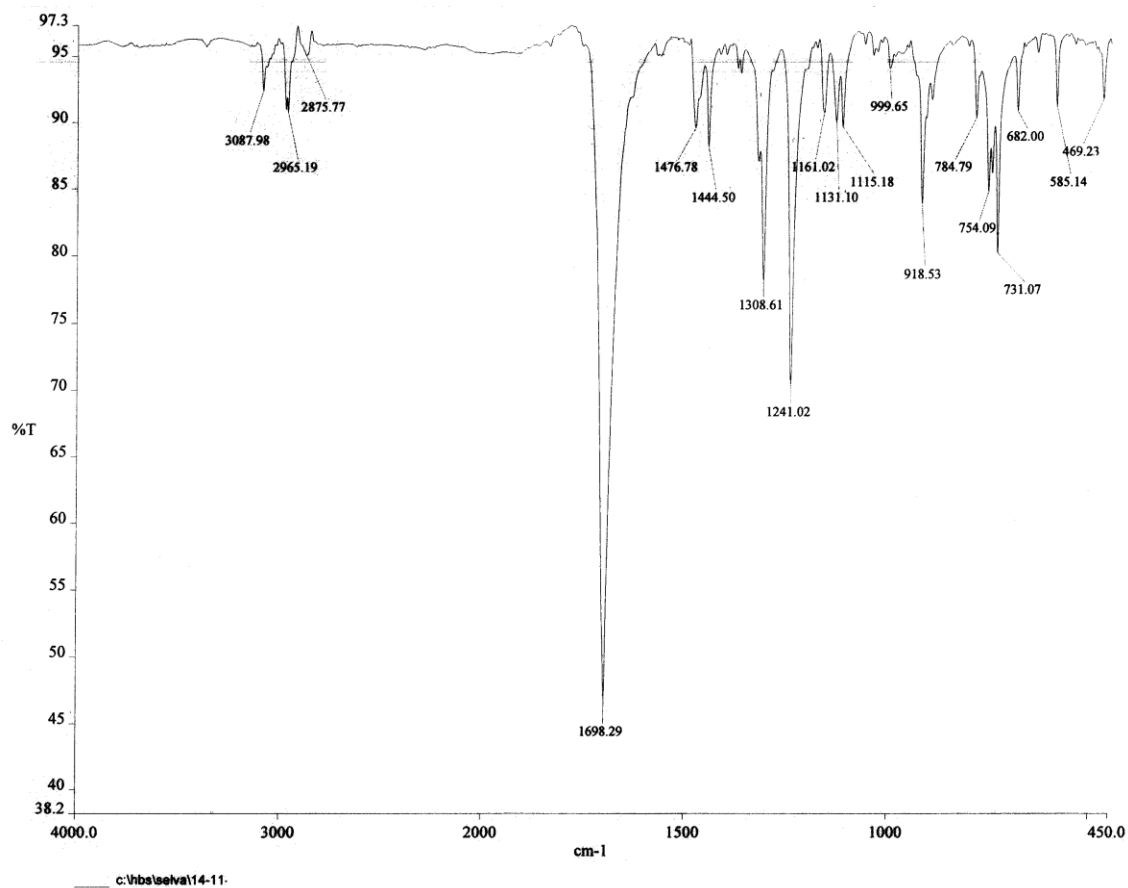

**Fig. S4** FT-IR spectrum of **25**

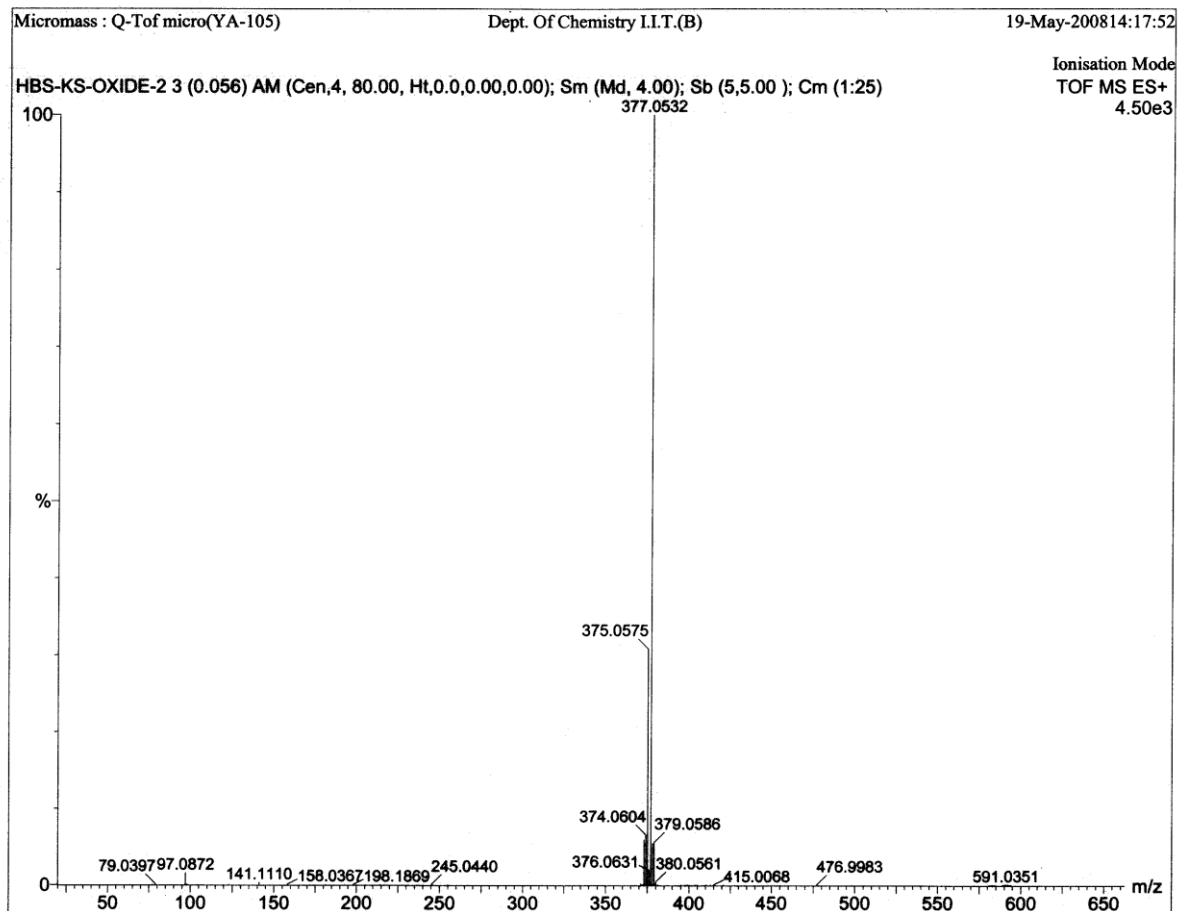

**Fig. S5** ES-MS spectrum of **25**

## Elemental Composition Report

Page 1

### Single Mass Analysis (displaying only valid results)

Tolerance = 20.0 PPM / DBE: min = -1.5, max = 50.0

Isotope cluster parameters: Separation = 1.0 Abundance = 1.0%

Monoisotopic Mass, Odd and Even Electron Ions

18 formula(e) evaluated with 1 results within limits (up to 50 closest results for each mass)

Micromass : Q-ToF micro (YA-105)

Dept. Of Chemistry I.I.T.(B)

13-Jun-2011 10:54:02

C<sub>18</sub>H<sub>16</sub>O<sub>4</sub>Se

HBS-KS-25 14 (0.139) AM (Cen,5, 80.00, Ht,5000.0,556.28,1.00); Sb (5,40.00); Cm (1:56)

TOF MS ES+  
9.33e3

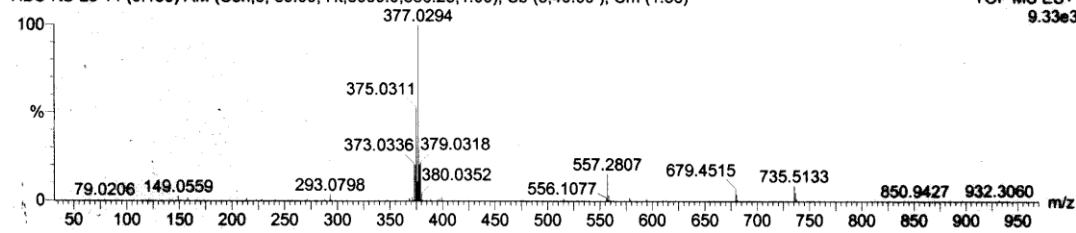

Minimum: -1.5  
Maximum: 200.0 20.0 50.0

| Mass     | Calc. Mass | mDa | PPM | DBE  | Score | Formula                                           |
|----------|------------|-----|-----|------|-------|---------------------------------------------------|
| 377.0294 | 377.0292   | 0.2 | 0.6 | 11.5 | 1     | C <sub>18</sub> H <sub>17</sub> O <sub>4</sub> Se |

Fig. S6 ES-HRMS spectrum of 25

### Eager 300 Report

Page: 1 Sample: KSSPIROSE1 (KSSPIROSE1)

Method Name : sp101008  
Method File : D:\CHNS2008\SP101008.mth  
Chromatogram : KSSPIROSE1  
Operator ID : SP Company Name : C.E. Instruments  
Analysed : 10/10/2008 15:40 Printed : 10/10/2008 16:57  
Sample ID : KSSPIROSE1 (# 26) Instrument N. : Instrument #1  
Analysis Type : UnkNown (Area) Sample weight : 1.877

Calib. method : using 'K Factors'

!!! Warning missing one or more peaks.

Warning Chromatogram has been subjected to manual integration.

| Element Name | %       | Ret.Time | Area    | BC | Area ratio | K factor    |
|--------------|---------|----------|---------|----|------------|-------------|
| Carbon       | 57.0184 | 64       | 2870223 | mi | 1.000000   | .267485E+07 |
| Hydrogen     | 4.1047  | 169      | 519678  | mi | 5.523079   | .648699E+07 |
| Totals       | 61.1231 |          | 3389901 |    |            |             |

Fig. S7 Elemental analysis for 25



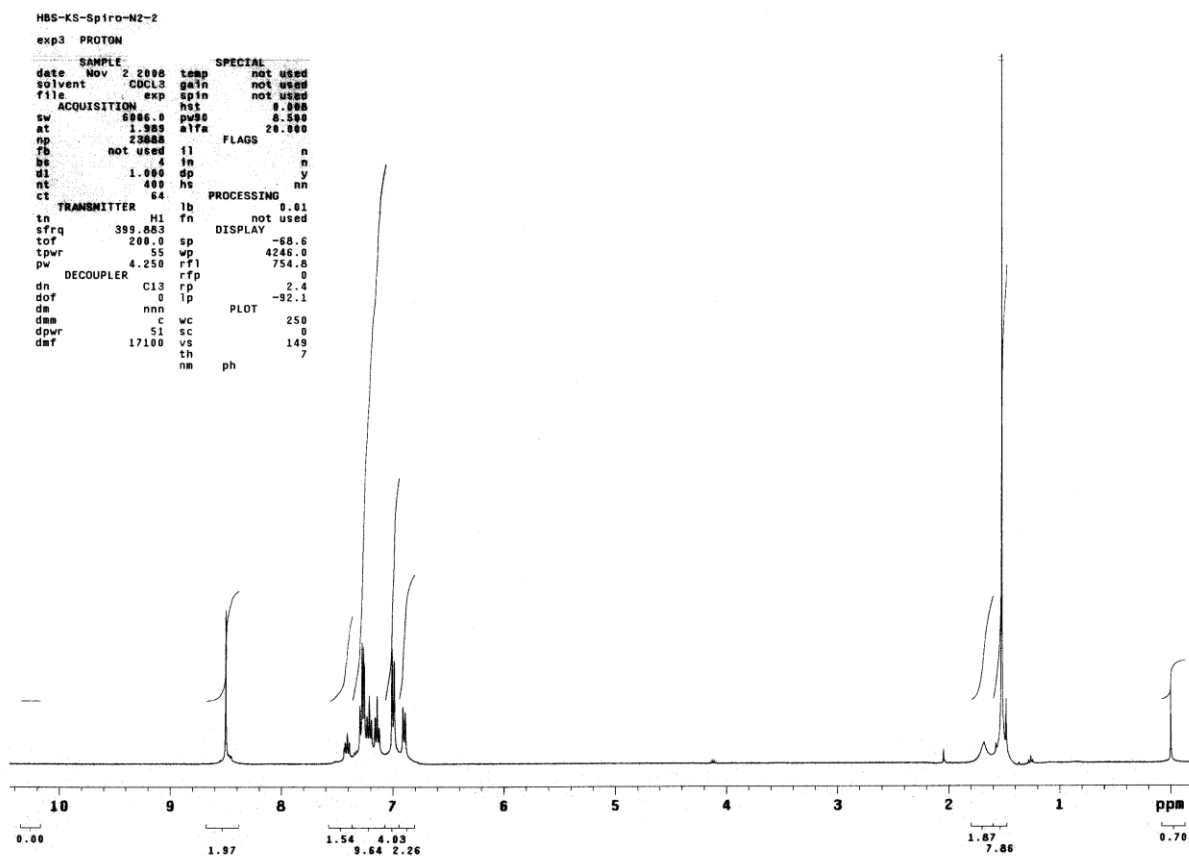

Fig. S8  $^1\text{H}$  NMR spectrum of **27**

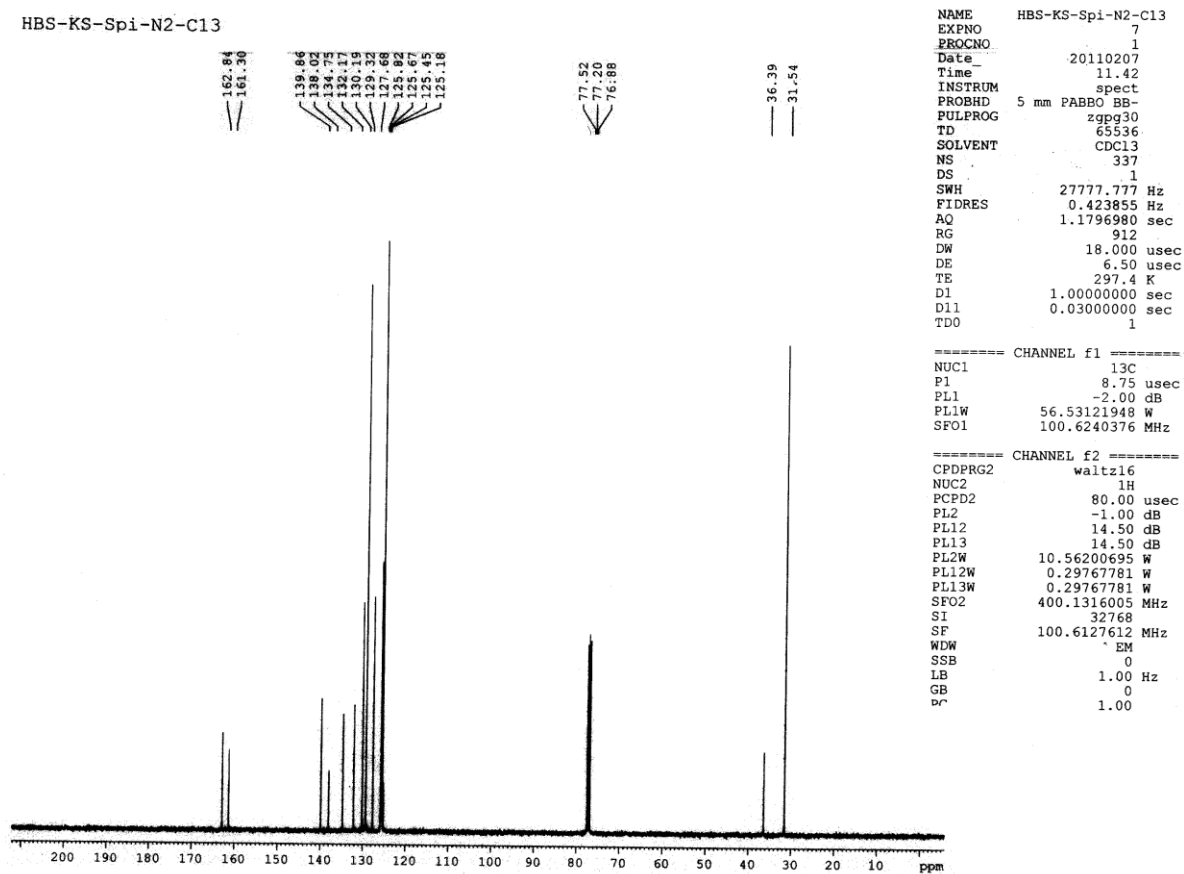

Fig. S9  $^{13}\text{C}$  NMR spectrum of 27

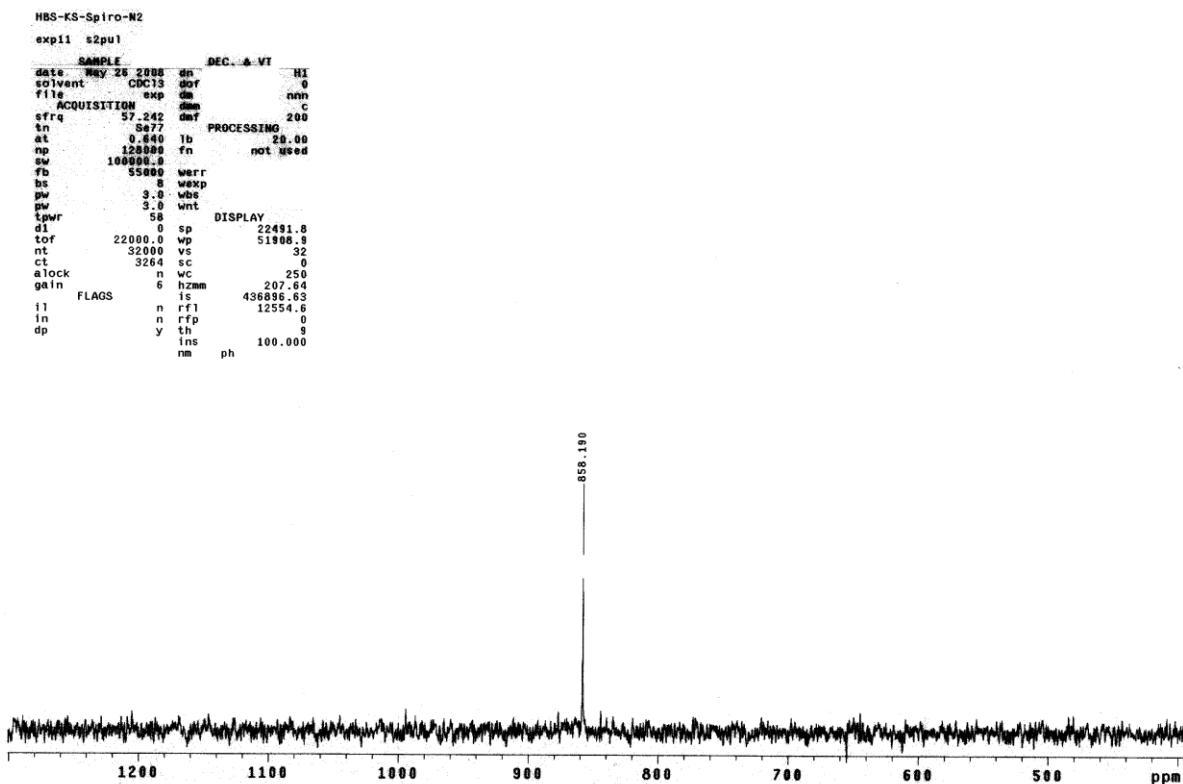

Fig. S10 <sup>77</sup>Se NMR spectrum of **27**

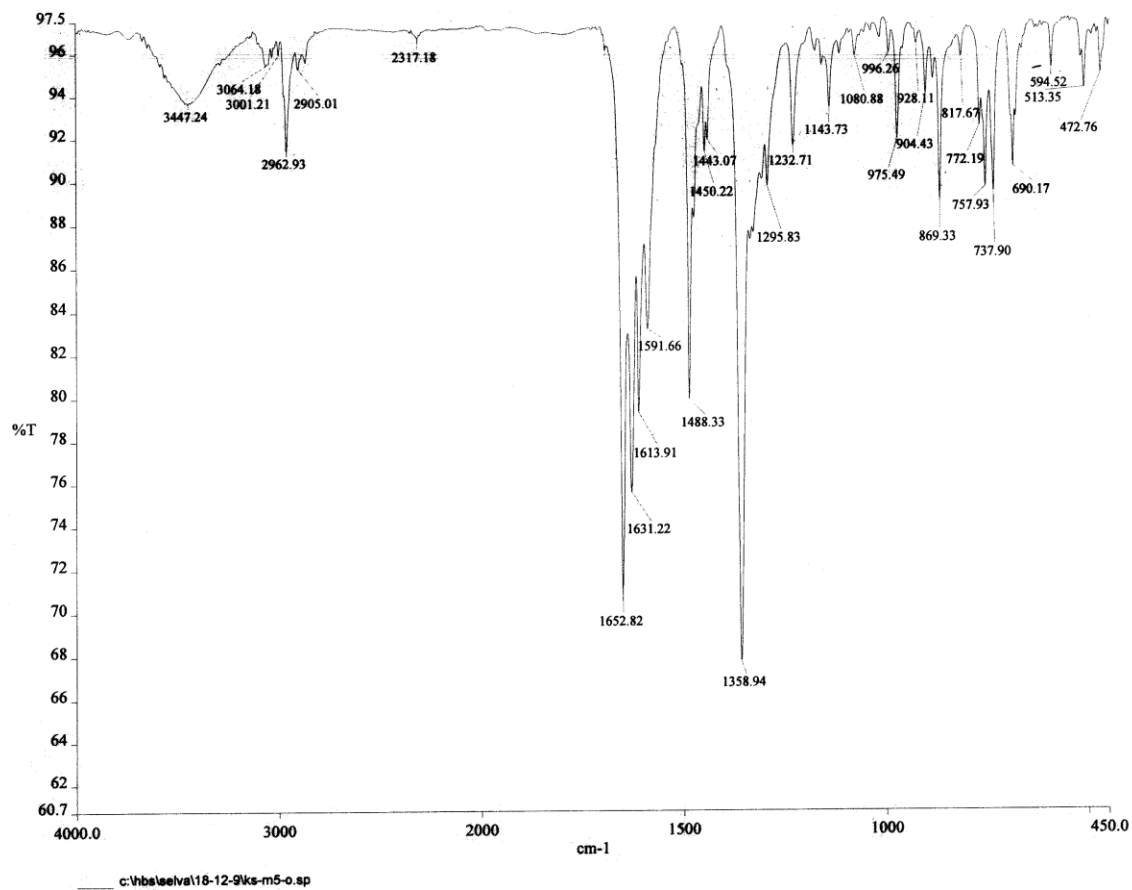

**Fig. S11** FT-IR spectrum of **27**

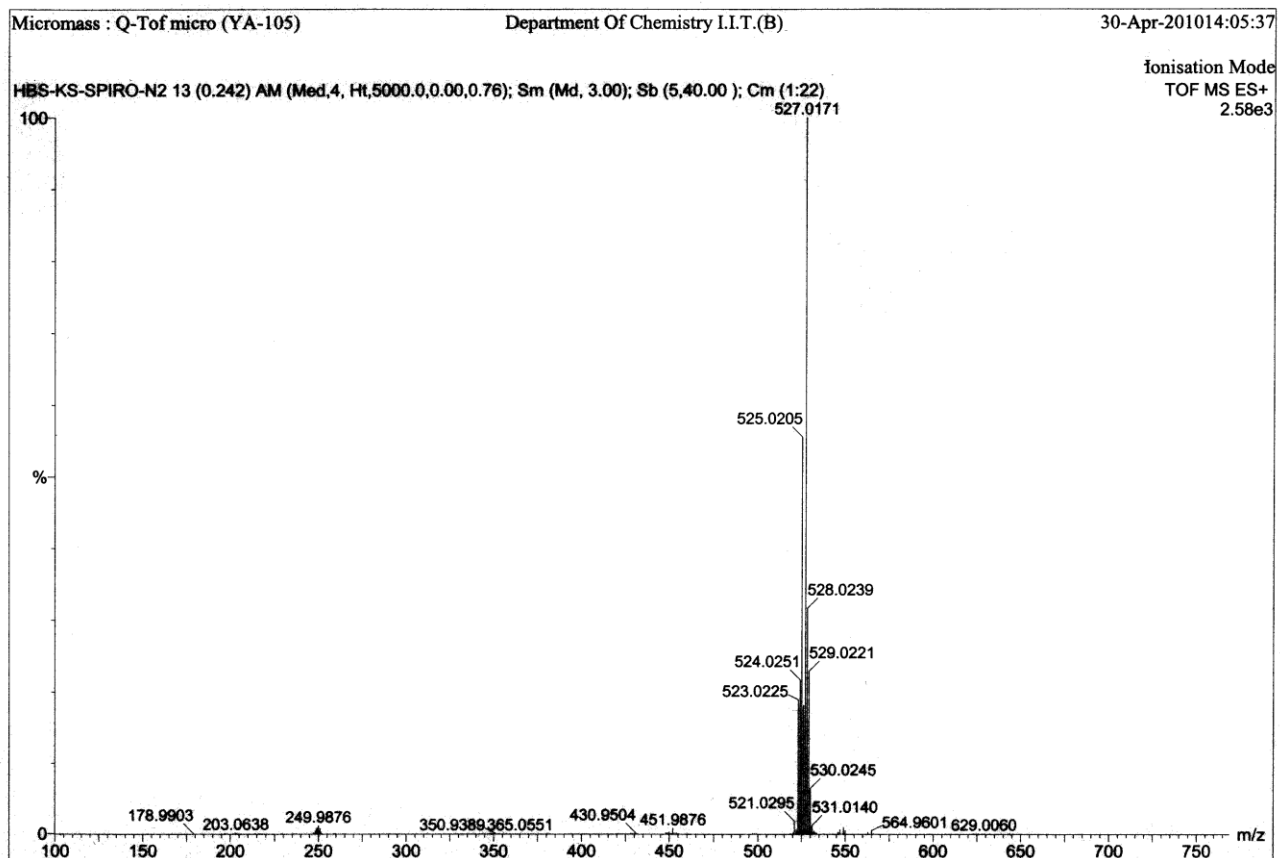

Fig. S12 ES-MS spectrum of 27

## Elemental Composition Report

Page 1

### Single Mass Analysis (displaying only valid results)

Tolerance = 20.0 PPM / DBE: min = -1.5, max = 50.0

Isotope cluster parameters: Separation = 1.0 Abundance = 1.0%

### Monoisotopic Mass, Odd and Even Electron Ions

28 formula(e) evaluated with 1 results within limits (up to 50 closest results for each mass)

Micromass : Q-ToF micro (YA-105)

Dept. Of Chemistry I.I.T.(B)

13-Jun-201111:04:30

C<sub>30</sub>H<sub>28</sub>N<sub>2</sub>O<sub>2</sub>Se

HBS-KS-27 26 (0.262) AM (Top,5, Ht,5000.0,556.28,1.00); Sm (Mn, 2x4.00); Sb (5,40.00); Cm (1:43)

TOF MS ES+  
6.10e3

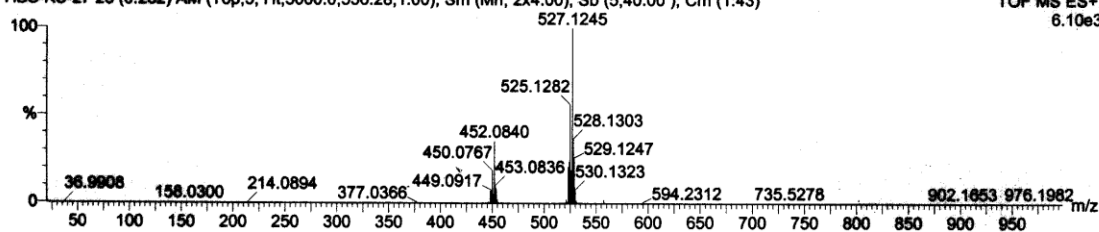

Minimum:

Maximum:

200.0 20.0 -1.5  
50.0

| Mass     | Calc. Mass | mDa | PPM | DBE  | Score | Formula                                                          |
|----------|------------|-----|-----|------|-------|------------------------------------------------------------------|
| 527.1245 | 527.1238   | 0.7 | 1.4 | 19.5 | 1     | C <sub>30</sub> H <sub>27</sub> N <sub>2</sub> O <sub>2</sub> Se |

Fig. S13 ES-HRMS spectrum of 27

### Eager 300 Report

SPTD N2-IMC

Page: 1 Sample: KS-RSEN2C (KS-RSEN2C)

Method Name : sp110209  
Method File : D:\CHNS2008\sp110209.mth  
Chromatogram : KS-RSEN2C  
Operator ID : AGK  
Analysed : 02/11/2009 14:49  
Sample ID : KS-RSEN2C (# 28)  
Analysis Type : UnkNown (Area)  
Company Name : C.E. Instruments  
Printed : 2/11/2009 16:04  
Instrument N. : Instrument #1  
Sample weight : 1.276

Calib. method : using 'K Factors'

!!! Warning missing one or more peaks.

| Element Name | %       | Ret.Time | Area    | BC | Area ratio | K factor    |
|--------------|---------|----------|---------|----|------------|-------------|
| Nitrogen     | 4.5646  | 43       | 60402   | FU | 38.151880  | .103706E+07 |
| 2            | 0.0000  | 59       | 37046   | FU |            | 0.0000      |
| Carbon       | 67.8109 | 65       | 2304462 | FU | 1.000000   | .266330E+07 |
| Hydrogen     | 4.6094  | 172      | 528119  | RS | 4.363528   | .717613E+07 |
| Totals       | 76.9849 |          | 2930029 |    |            |             |

Fig. S14 Elemental analysis for 27

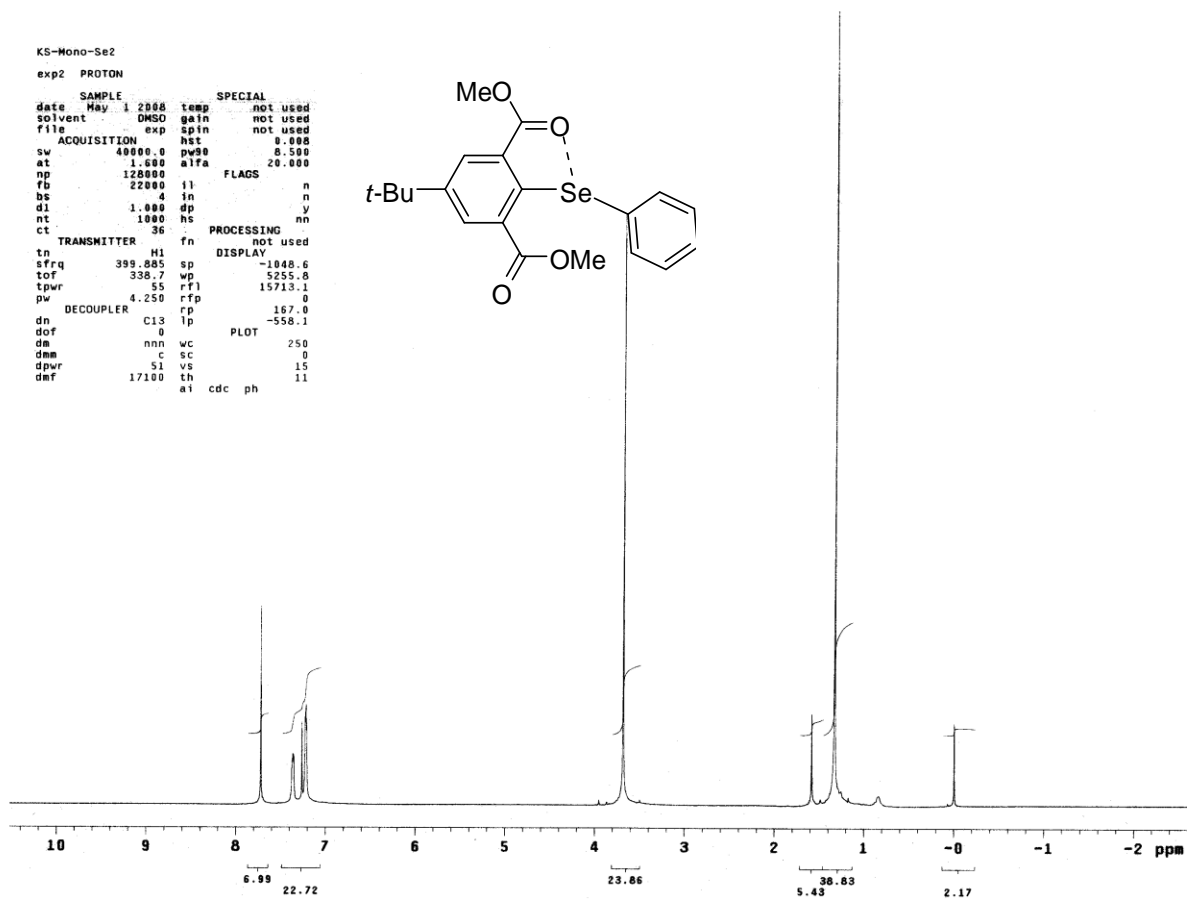

Fig. S15 <sup>1</sup>H NMR Spectrum of 29



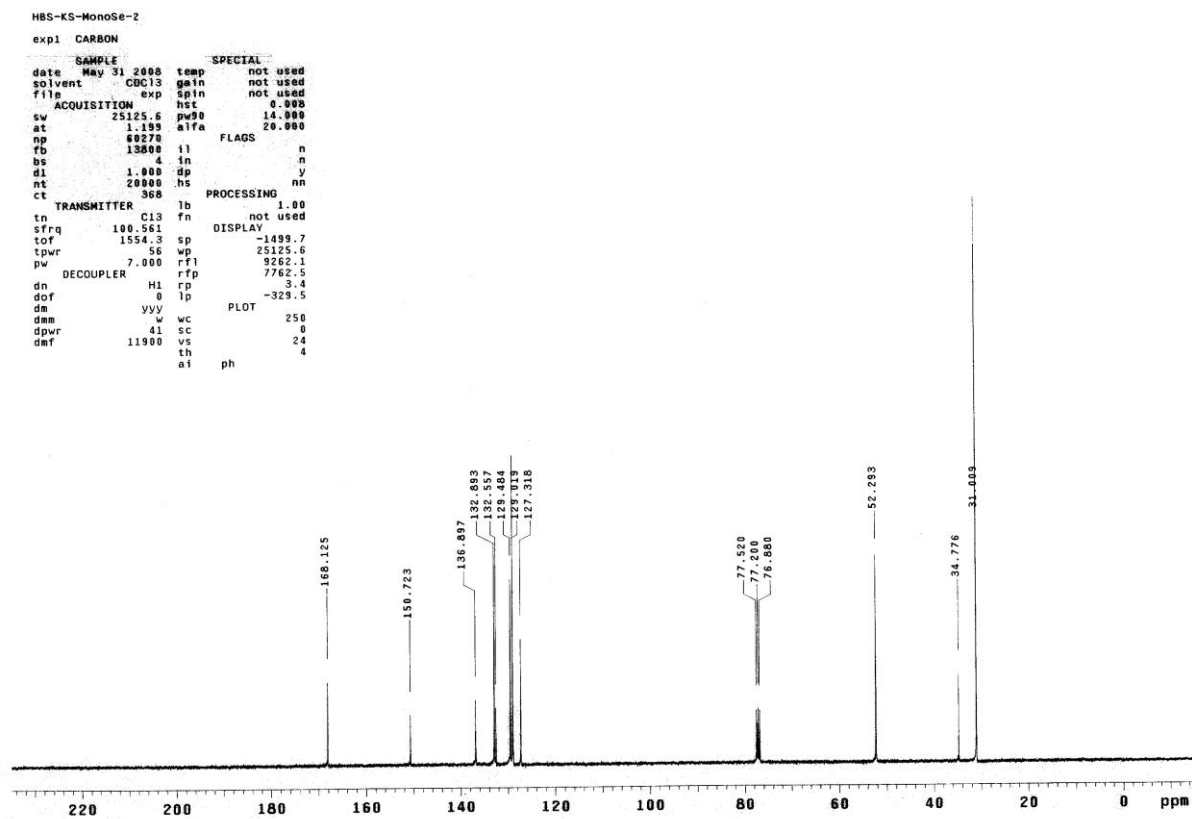

Fig. S16  $^{13}\text{C}$  NMR Spectrum of **29**

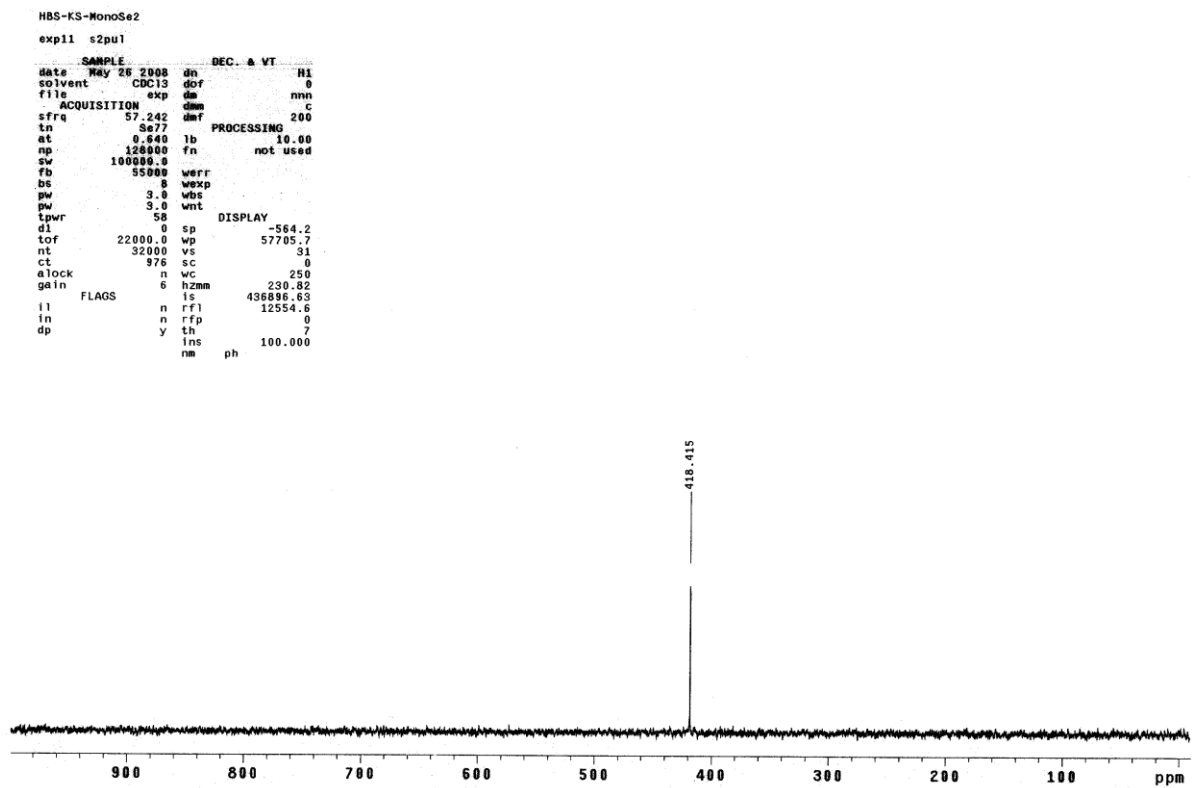

Fig. S17  $^{77}\text{Se}$  NMR Spectrum of **29**

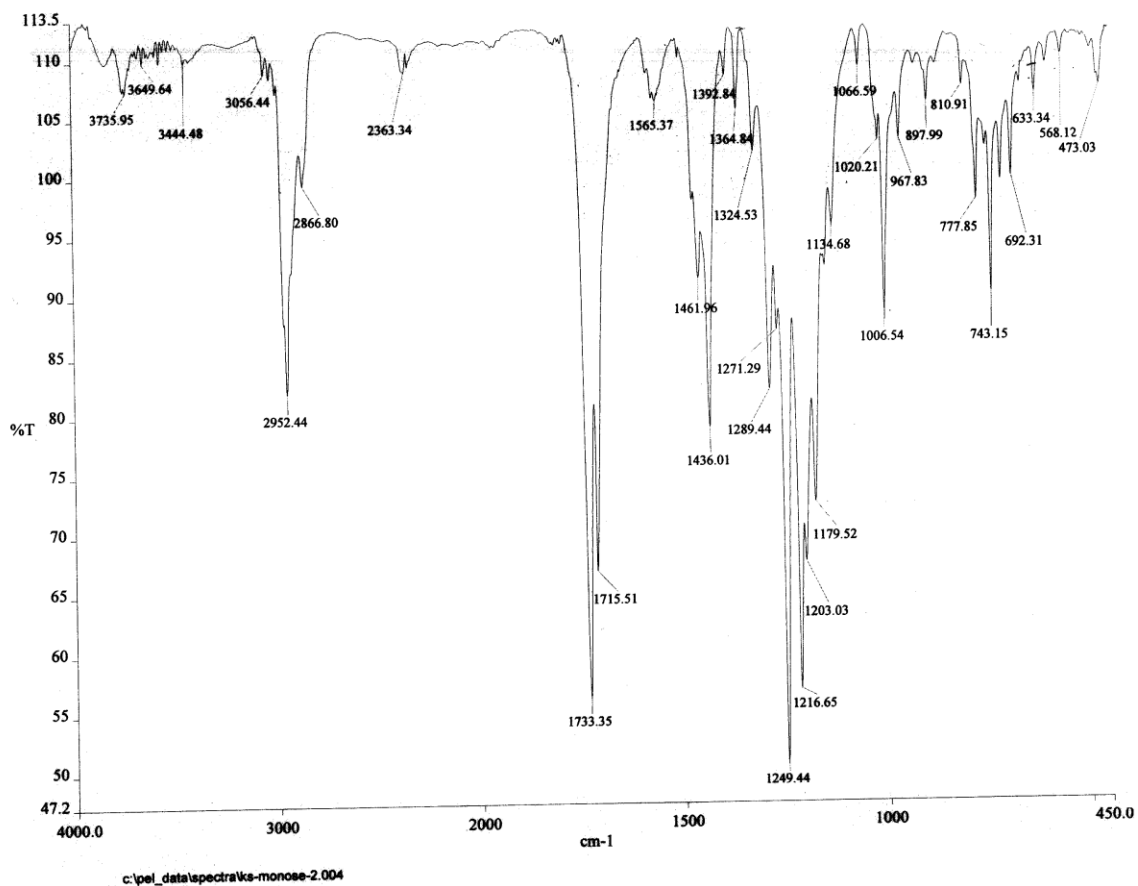

**Fig. S18** FT-IR Spectrum of **29**

## Elemental Composition Report

Page 1

### Single Mass Analysis (displaying only valid results)

Tolerance = 20.0 PPM / DBE: min = -1.5, max = 50.0

Isotope cluster parameters: Separation = 1.0 Abundance = 1.0%

Monoisotopic Mass, Odd and Even Electron Ions

19 formula(e) evaluated with 1 results within limits (up to 50 closest results for each mass)

Micromass : Q-ToF micro (YA-105)

Dept. Of Chemistry I.I.T.(B)

13-Jun-2011 11:33:43

C<sub>20</sub>H<sub>22</sub>O<sub>4</sub>Se

HBS-KS-29 16 (0.160) AM (Med,5, Ht,5000.0,556.28,1.00); Sb (5,40.00); Cm (1:31)

TOF MS ES+  
4.37e3

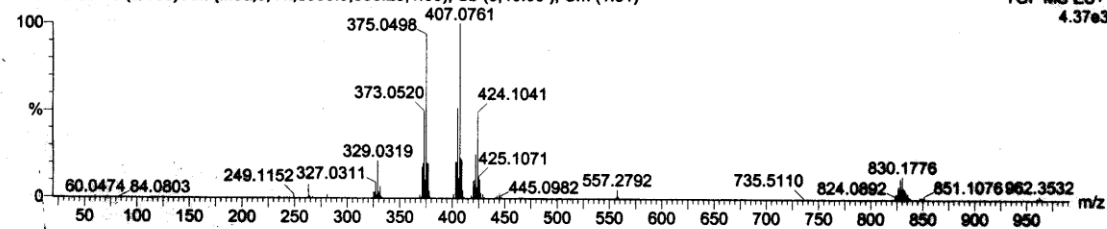

Minimum:

Maximum: 200.0 20.0 -1.5

50.0

| Mass     | Calc. Mass | mDa  | PPM  | DBE  | Score | Formula                                           |
|----------|------------|------|------|------|-------|---------------------------------------------------|
| 407.0761 | 407.0762   | -0.1 | -0.2 | 10.5 | 1     | C <sub>20</sub> H <sub>23</sub> O <sub>4</sub> Se |

Fig. S19 ES-HRMS spectrum of 29

### Eager 300 Report

Page: 1 Sample: KSMONOSE2 (KSMONOSE2)

Method Name : sp101008  
Method File : D:\CHNS2008\SP101008.mth  
Chromatogram : KSMONOSE2  
Operator ID : SP Company Name : C.E. Instruments  
Analysed : 10/10/2008 15:48 Printed : 10/10/2008 16:57  
Sample ID : KSMONOSE2 (# 27) Instrument N. : Instrument #1  
Analysis Type : UnkNown (Area) Sample weight : 1.99

Calib. method : using 'K Factors'

!!! Warning missing one or more peaks.

Warning Chromatogram has been subjected to manual integration.

| Element Name | %       | Ret.Time | Area    | BC | Area ratio | K factor    |
|--------------|---------|----------|---------|----|------------|-------------|
| Carbon       | 58.5181 | 63       | 3122393 | mi | 1.000000   | .267485E+07 |
| Hydrogen     | 5.5355  | 174      | 734467  | mi | 4.251236   | .646699E+07 |
| Totals       | 64.0535 |          | 3856860 |    |            |             |

Fig. S20 Elemental analysis for 29

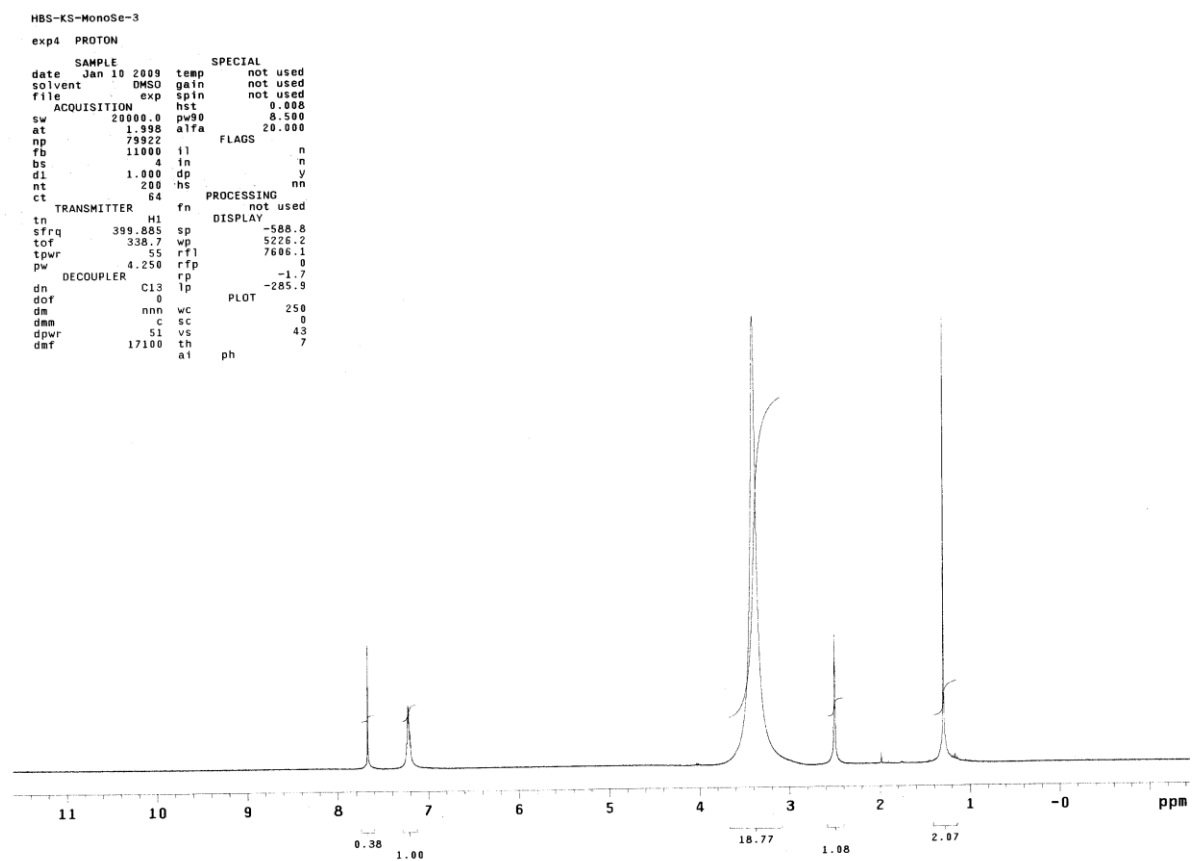

Fig. S21  $^1\text{H}$  NMR Spectrum of **30**

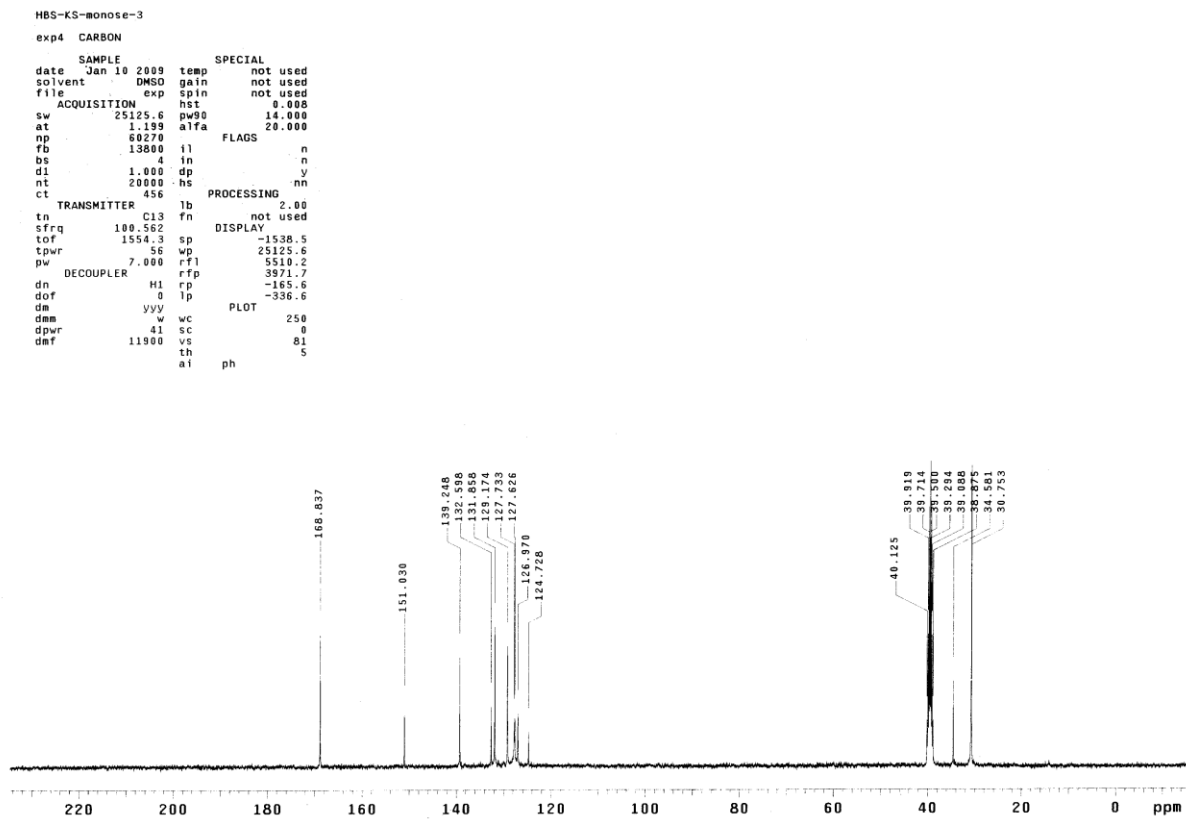

Fig. S22  $^{13}\text{C}$  NMR Spectrum of **30**

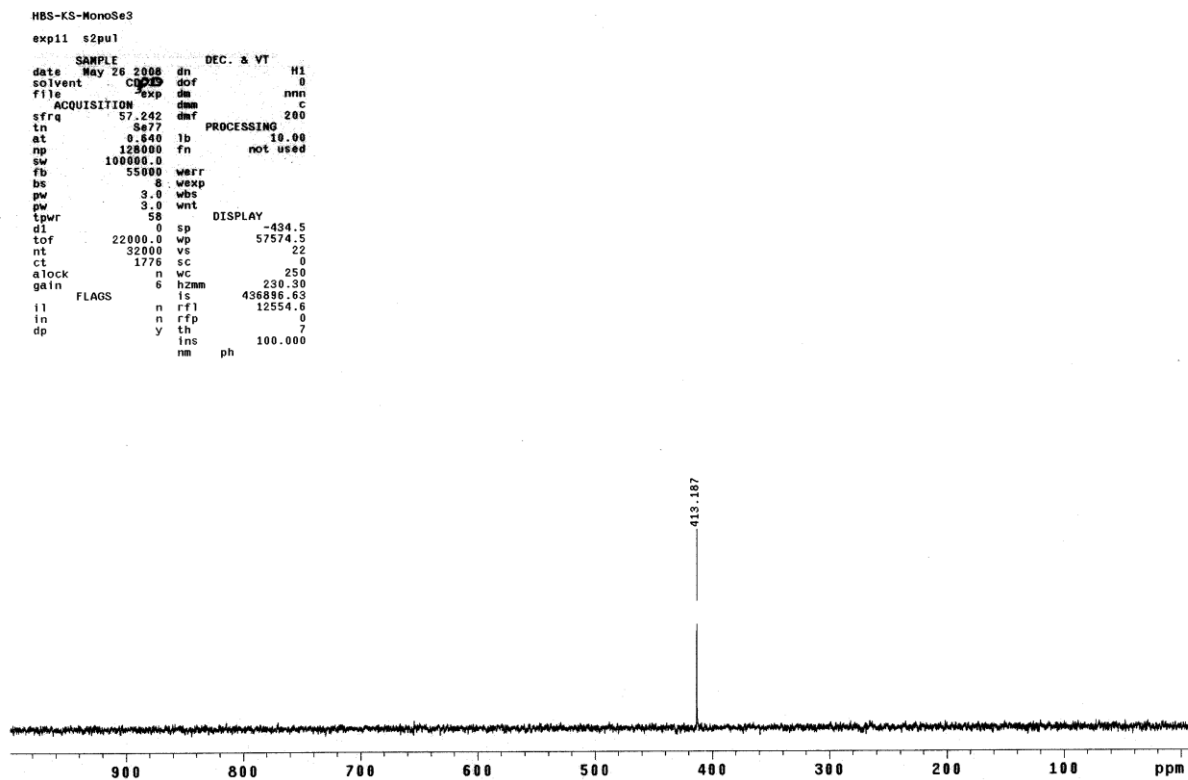

Fig. S23  $^{77}\text{Se}$  NMR Spectrum of 30



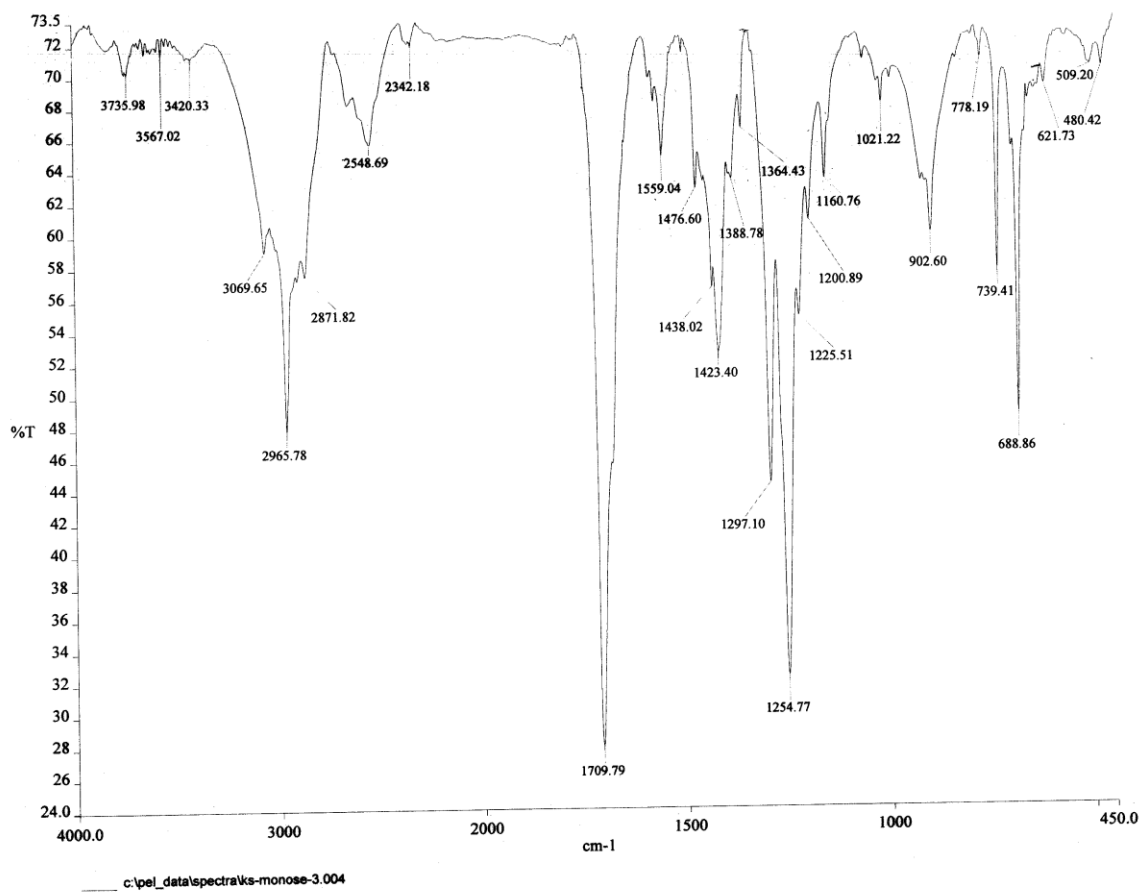

**Fig. S24** FT-IR spectrum of **30**

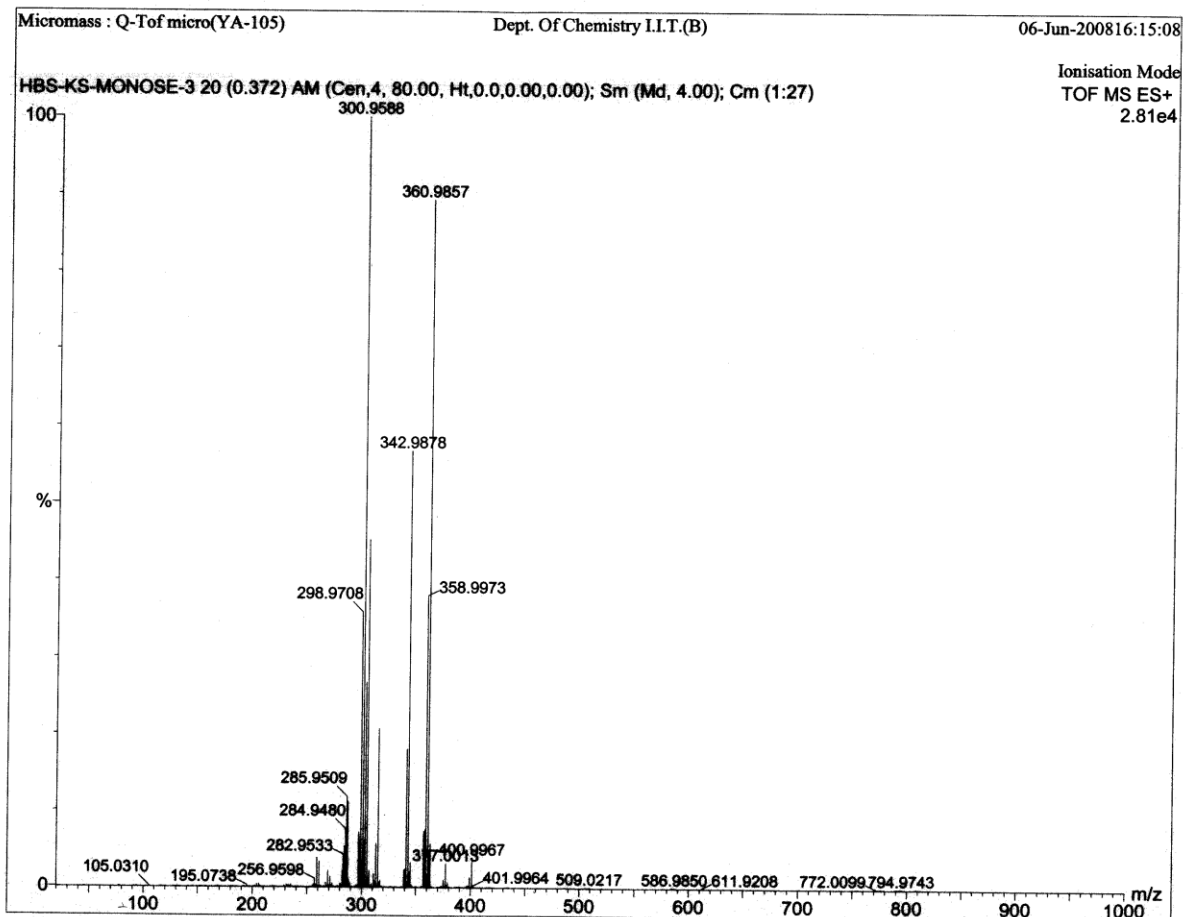

Fig. S25 ES-MS spectrum of 30

## Elemental Composition Report

Page 1

### Single Mass Analysis (displaying only valid results)

Tolerance = 20.0 PPM / DBE: min = -1.5, max = 50.0

Isotope cluster parameters: Separation = 1.0 Abundance = 1.0%

### Monoisotopic Mass, Odd and Even Electron Ions

22 formula(e) evaluated with 1 results within limits (up to 50 closest results for each mass)

Micromass : Q-ToF micro (YA-105)

Dept. Of Chemistry I.I.T.(B)

13-Jun-2011 12:05:30

C<sub>18</sub>H<sub>18</sub>O<sub>4</sub>Se

HBS-KS-30 40 (0.398) AM (Med,5, Ar,5000.0,556.28,1.00); Sm (Mn, 3x6.00); Sb (5,40.00); Cm (1:43)

TOF MS ES+  
3.81e4

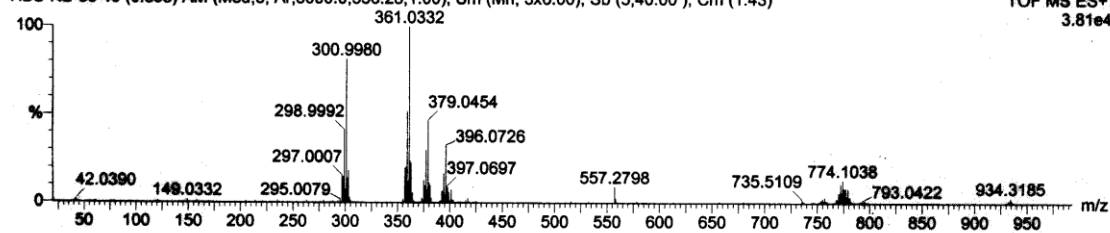

Minimum:

Maximum: 200.0 20.0 -1.5

Mass Calc. Mass mDa PPM DBE Score Formula

| Mass     | Calc. Mass | mDa | PPM | DBE  | Score | Formula                                           |
|----------|------------|-----|-----|------|-------|---------------------------------------------------|
| 379.0454 | 379.0449   | 0.6 | 1.5 | 10.5 | 1     | C <sub>18</sub> H <sub>19</sub> O <sub>4</sub> Se |

Fig. S26 ES-HRMS spectrum of 30

~~KS-M2~~ Eager 300 Report

Page: 1    Sample: ~~KS-M2~~ (KS-M2) KS-M3

Method Name : SP290410  
Method File : D:\CHNS2008\SP290410.mth  
Chromatogram : KS-M2  
Operator ID : SP  
Analysed : 04/29/2010 14:04  
Sample ID : KS-M2 (# 21)  
Analysis Type : UnkNown (Area)

Company Name : C.E. Instruments  
Printed : 4/29/2010 17:01  
Instrument N. : Instrument #1  
Sample weight : 1.561

Calib. method : using 'K Factors'

!!! Warning missing one or more peaks.

| Element Name | %       | Ret.Time | Area    | BC | Area ratio | K factor    |
|--------------|---------|----------|---------|----|------------|-------------|
| Carbon       | 57.8064 | 65       | 2238365 | RS | 1.000000   | .247571E+07 |
| Hydrogen     | 5.3952  | 172      | 623917  | RS | 3.587601   | .653955E+07 |
| Totals       | 63.2016 |          | 2862282 |    |            |             |

Fig. S27 Elemental analysis for 30

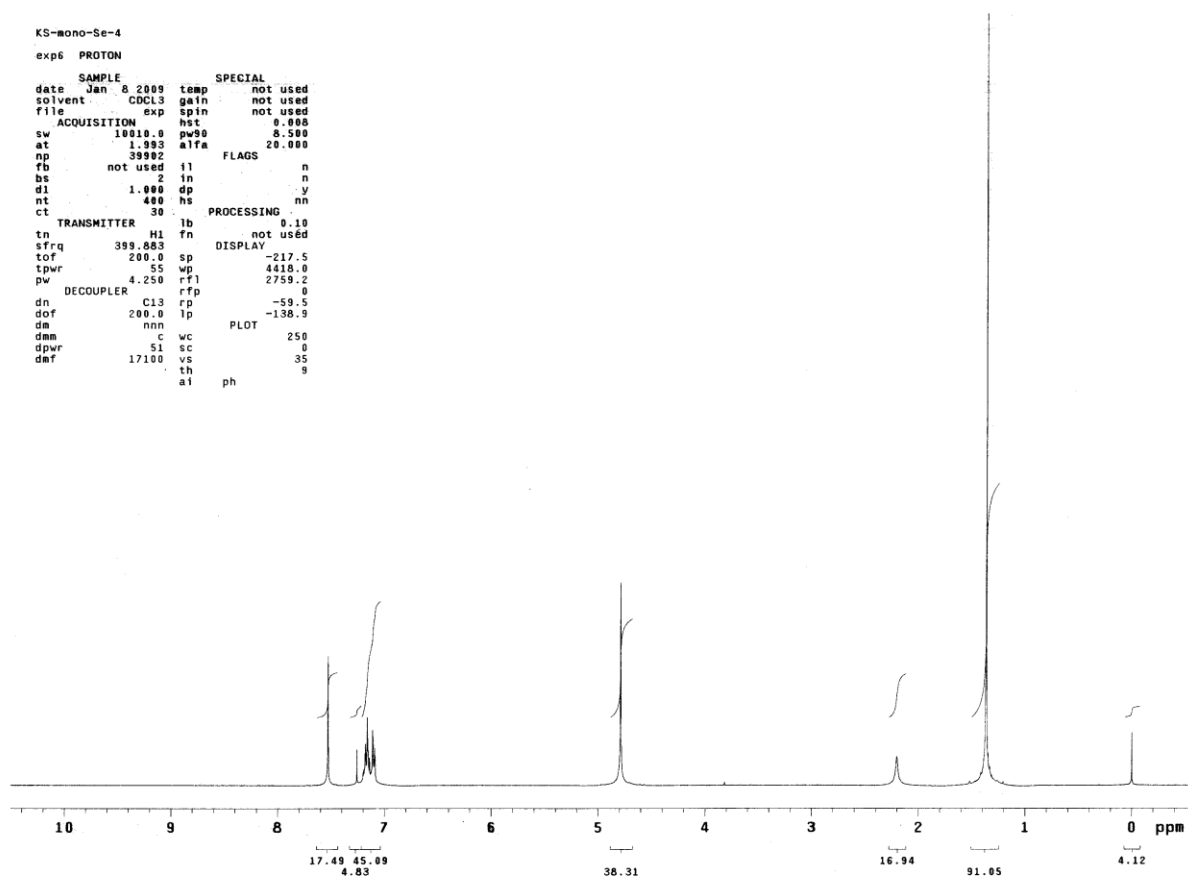

Fig. S28.  $^1\text{H}$  NMR Spectrum of **31**

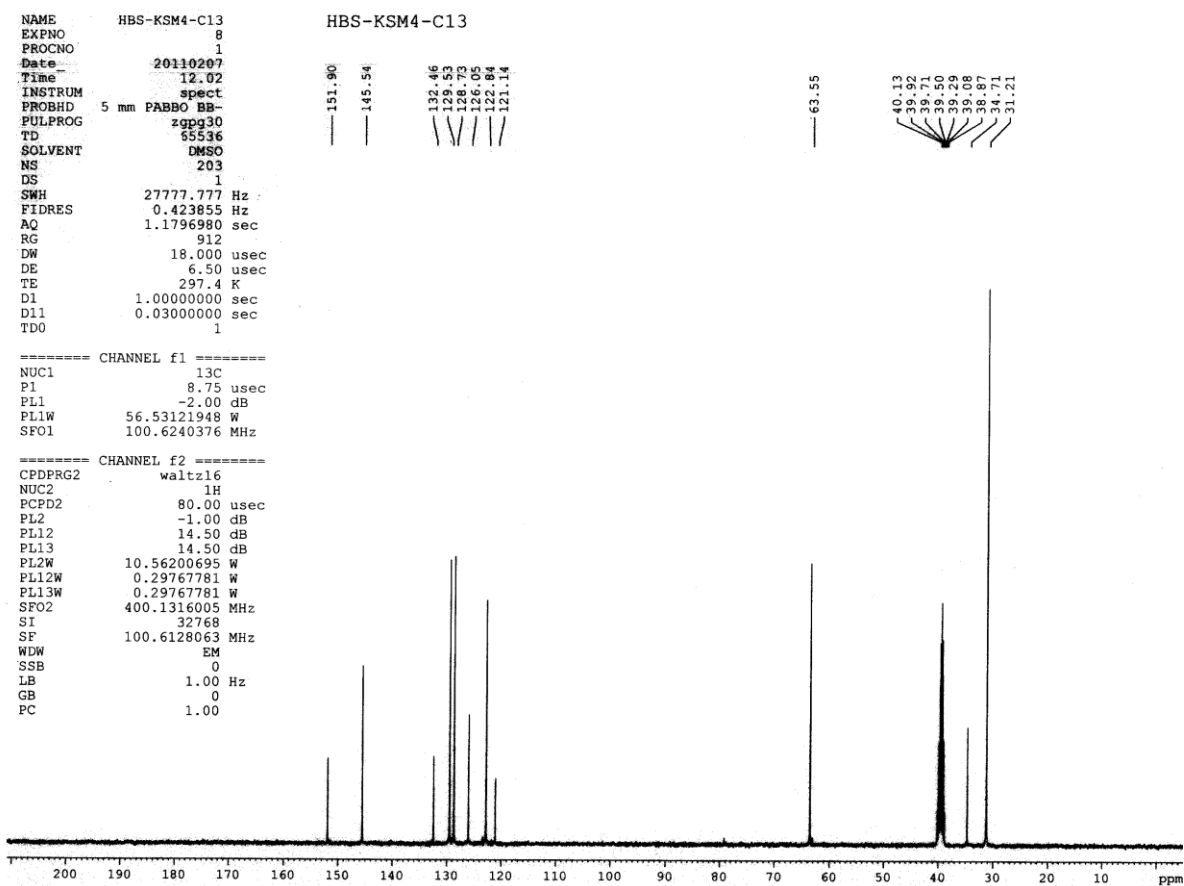

Fig. S29  $^{13}\text{C}$  NMR Spectrum of 31

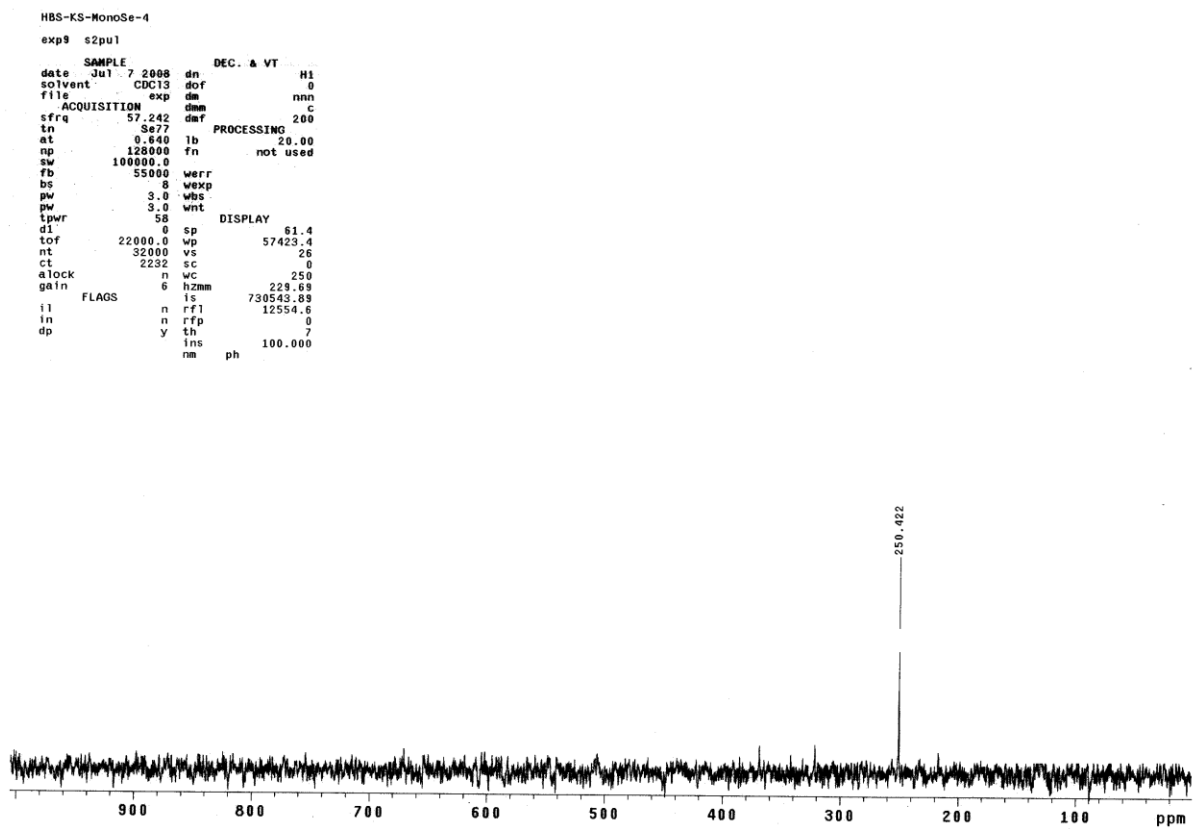

Fig. S30  $^{77}\text{Se}$  NMR Spectrum of **31**

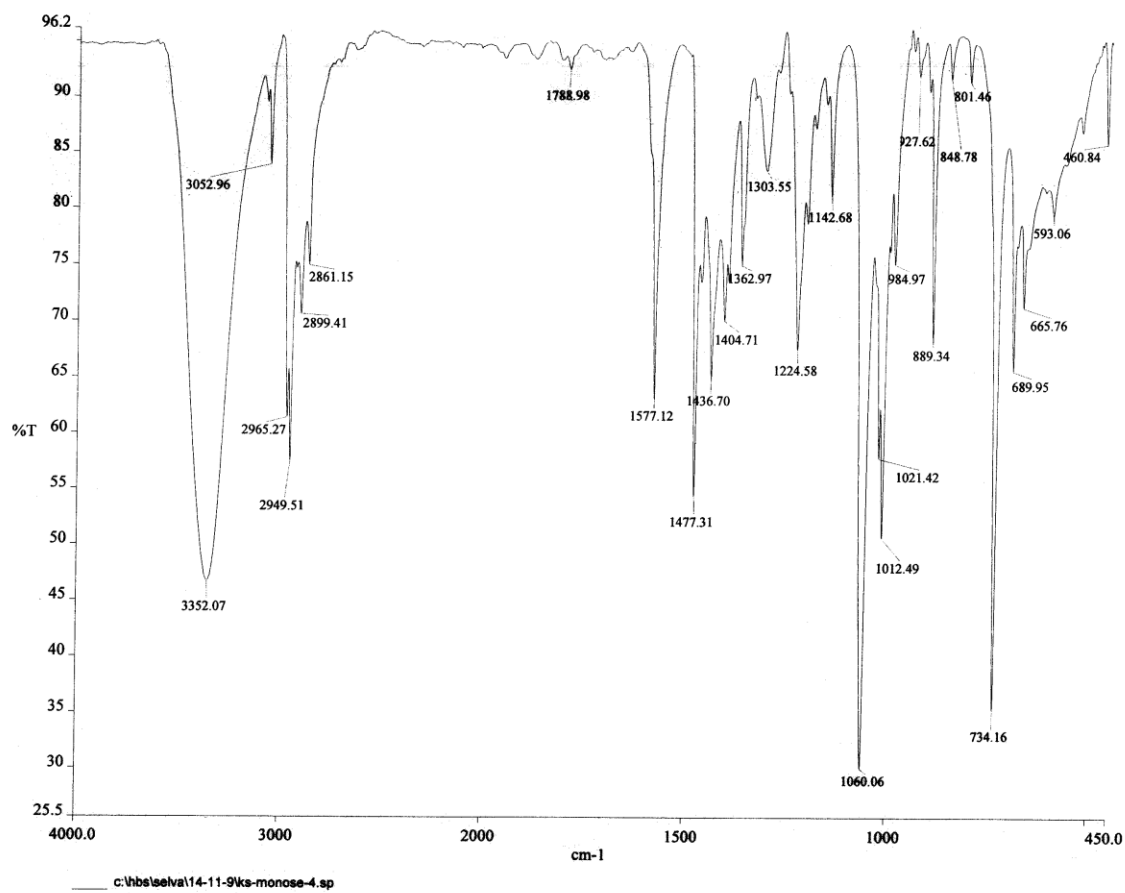

**Fig. S31.** FT-IR spectrum of **31**



## Elemental Composition Report

Page 1

### Single Mass Analysis (displaying only valid results)

Tolerance = 20.0 PPM / DBE: min = -1.5, max = 50.0

Isotope cluster parameters: Separation = 1.0 Abundance = 1.0%

Monoisotopic Mass, Odd and Even Electron Ions

12 formula(e) evaluated with 1 results within limits (up to 50 closest results for each mass)

Micromass : Q-ToF micro (YA-105)

Dept. Of Chemistry I.I.T.(B)

13-Jun-2011 12:31:57

C<sub>18</sub>H<sub>22</sub>O<sub>2</sub>Se

HBS-KS-31 16 (0.158) AM (Med,5, Ht,5000.0,556.28,1.00); Sb (5,40.00); Cm (12:38)

TOF MS ES+  
4.64e3

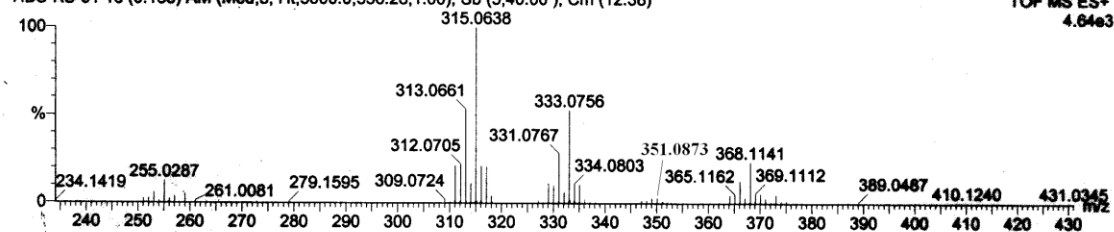

Minimum:

Maximum: 200.0 20.0 -1.5

Mass Calc. Mass mDa PPM DBE Score Formula

| Mass     | Calc. Mass | mDa | PPM | DBE | Score | Formula                                           |
|----------|------------|-----|-----|-----|-------|---------------------------------------------------|
| 351.0873 | 351.0863   | 1.0 | 2.7 | 8.5 | 1     | C <sub>18</sub> H <sub>23</sub> O <sub>2</sub> Se |

Fig. S32. ES-HRMS spectrum of 31

### Eager 300 Report

Page: 1 Sample: KSM4 (KSM4)

Method Name : SP061109  
Method File : D:\CHNS2008\SP061109.mth  
Chromatogram : KSM4  
Operator ID : SP  
Analysed : 11/06/2009 10:15  
Sample ID : KSM4 (# 13)  
Analysis Type : UnkNown (Area)

Company Name : C.E. Instruments  
Printed : 11/6/2009 13:10  
Instrument N. : Instrument #1  
Sample weight : .525

Calib. method : using 'K Factors'

!!! Warning missing one or more peaks.

| Element Name | %       | Ret.Time | Area   | BC | Area ratio | K factor    |
|--------------|---------|----------|--------|----|------------|-------------|
| Carbon       | 61.8350 | 67       | 803921 | RS | 1.000000   | .246719E+07 |
| Hydrogen     | 5.6762  | 178      | 164388 | RS | 4.890388   | .525645E+07 |
| Totals       | 67.5112 |          | 968309 |    |            |             |

Fig. S33 Elemental analysis for 31

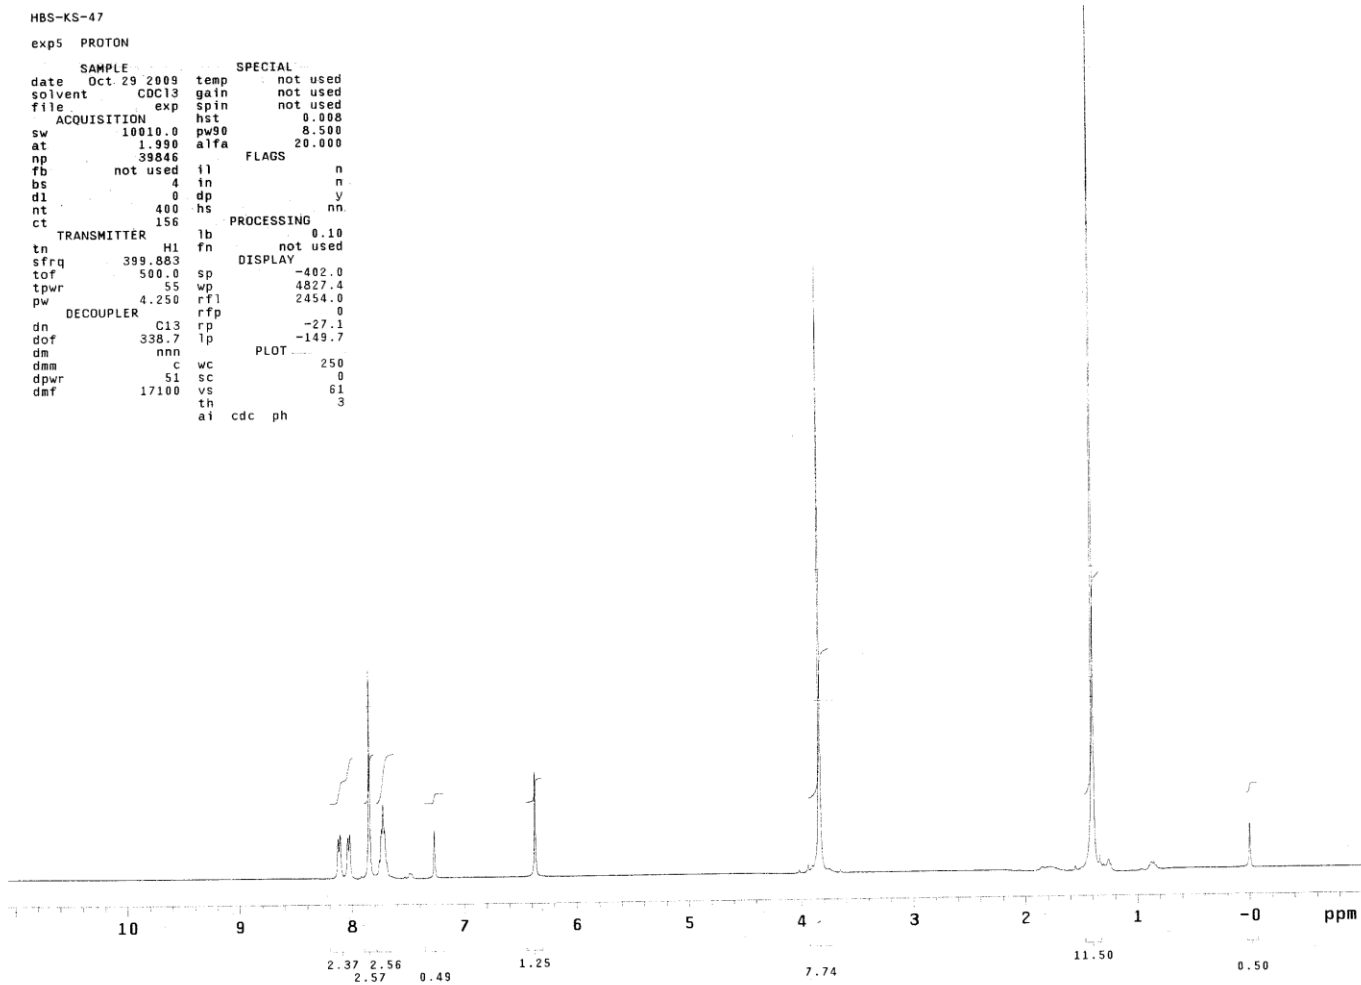

Fig. S34  $^1\text{H}$  NMR spectrum of **37**

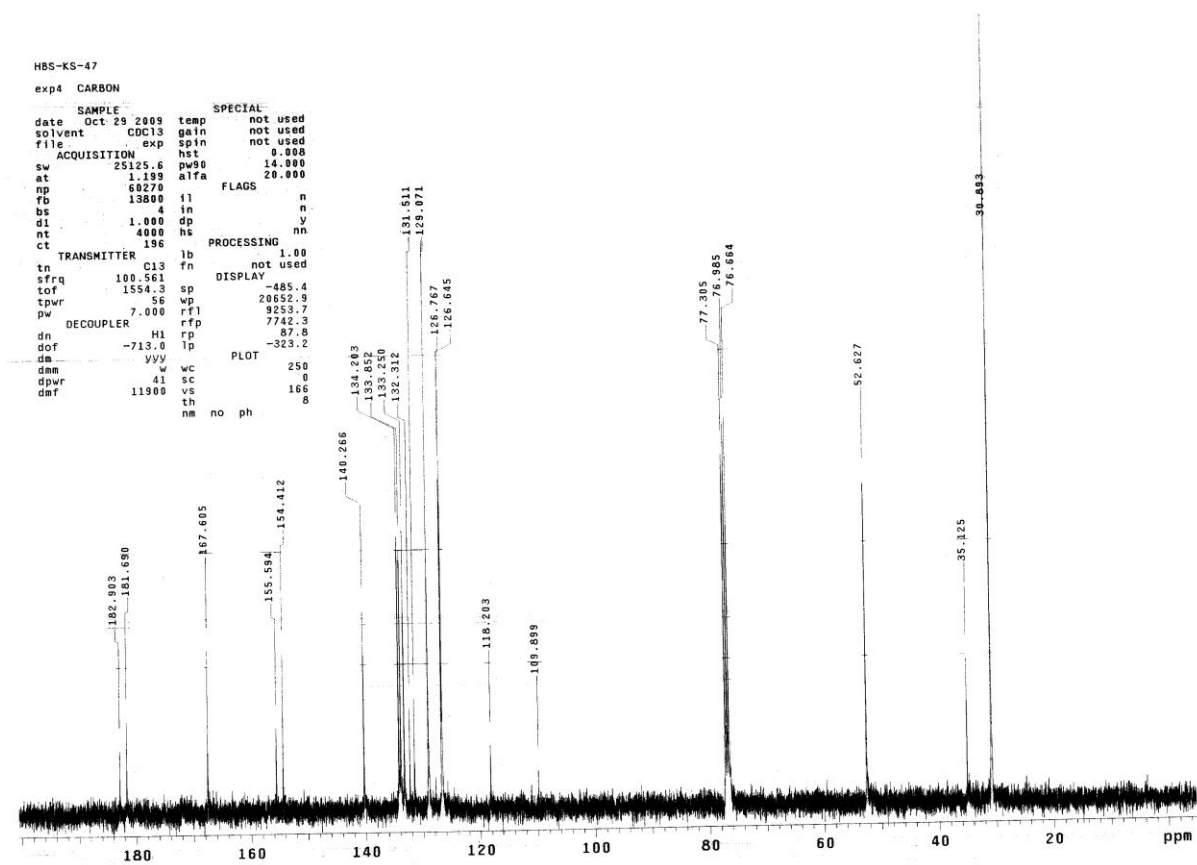

Fig. S35  $^{13}\text{C}$  NMR spectrum of **37**

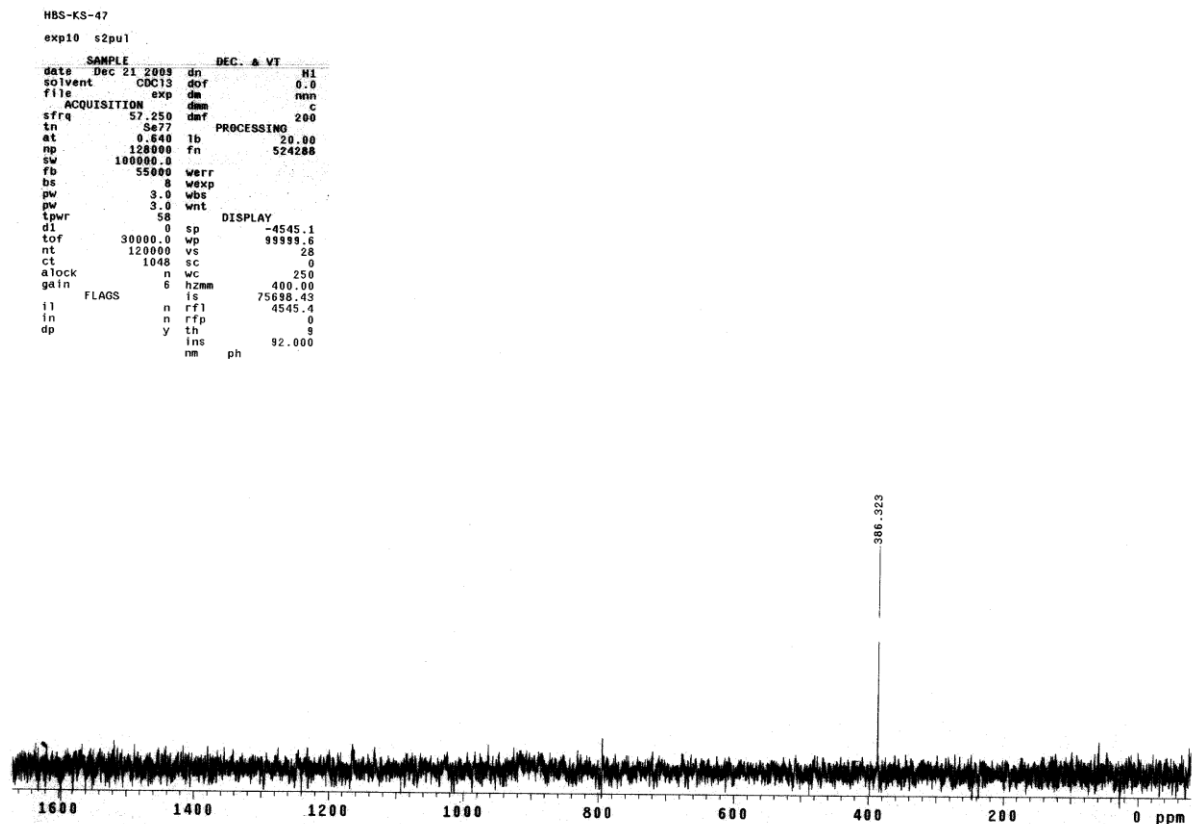

Fig. S36  $^{77}\text{Se}$  NMR spectrum of **37**

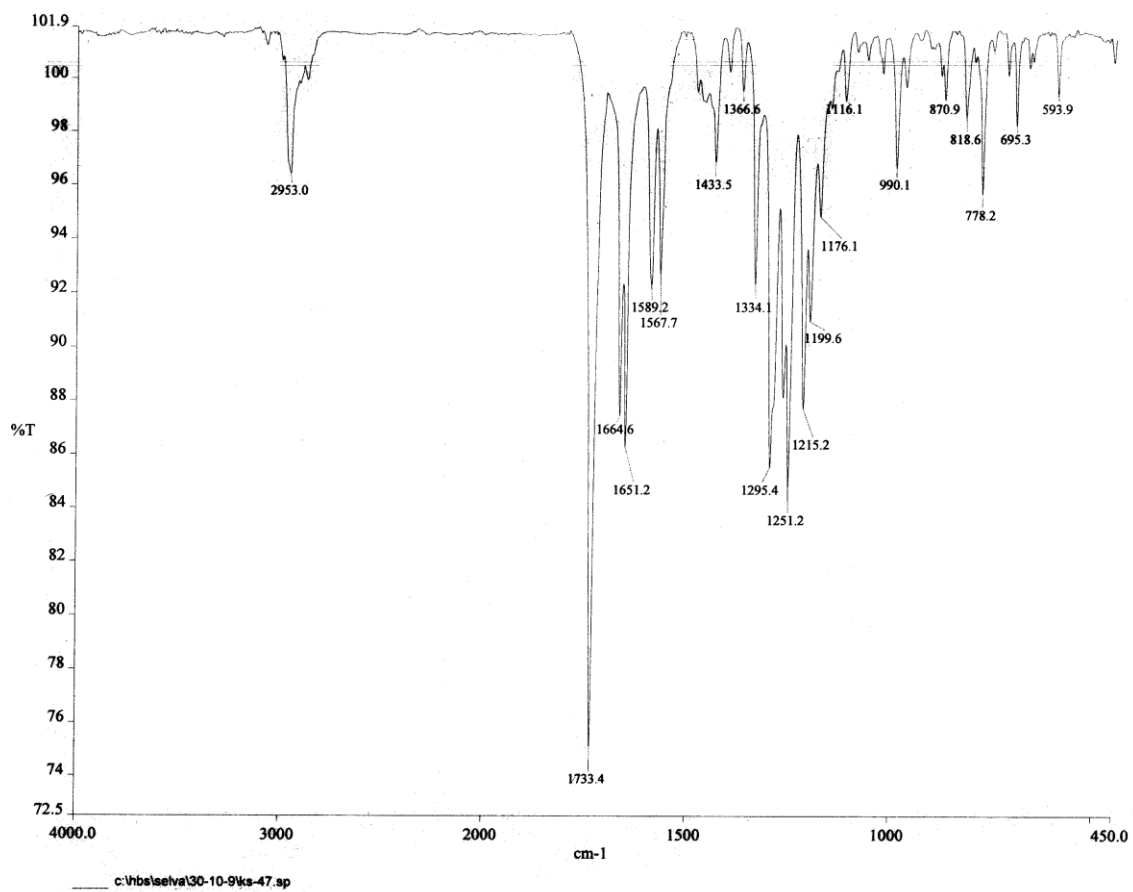

**Fig. S37** FT-IR spectrum of **37**

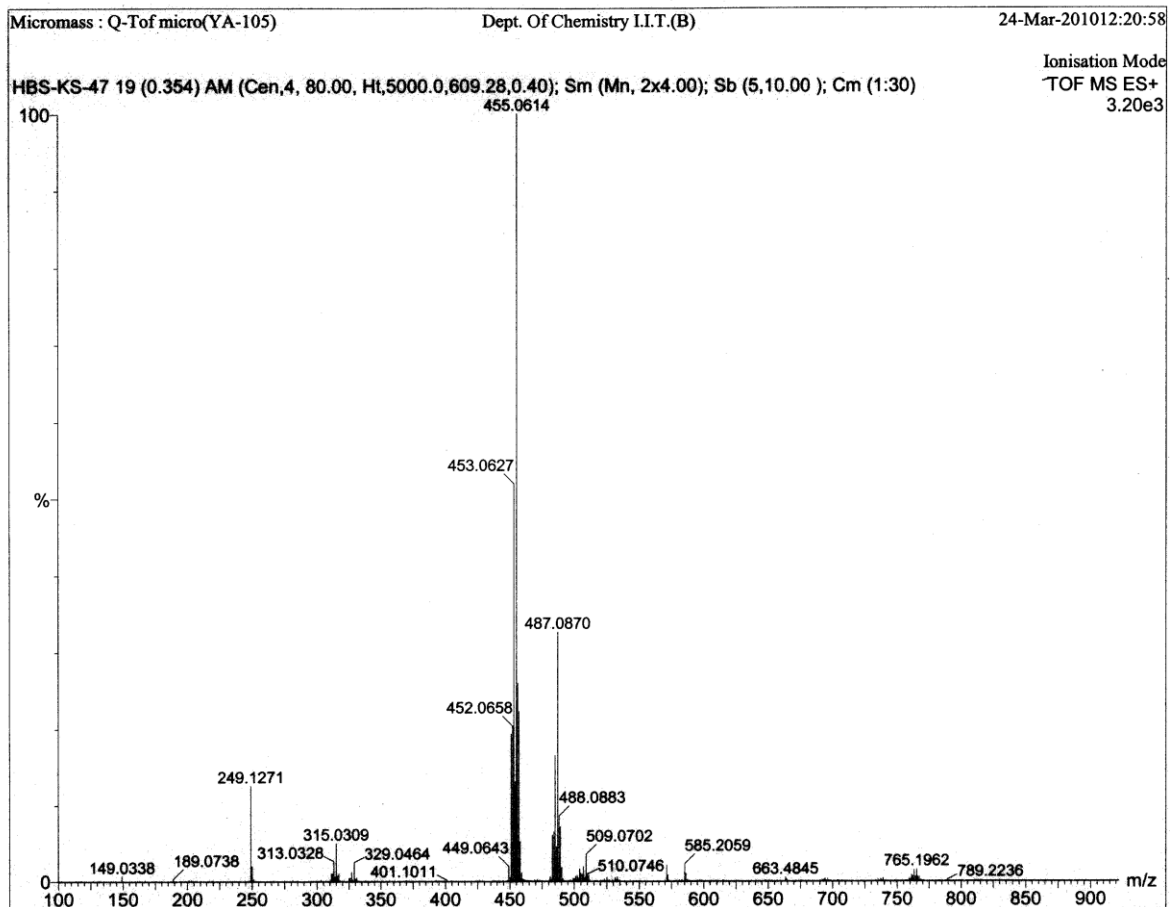

**Fig. S38** ES-MS spectrum of **37**

## Elemental Composition Report

Page 1

### Single Mass Analysis (displaying only valid results)

Tolerance = 20.0 PPM / DBE: min = -1.5, max = 50.0

Isotope cluster parameters: Separation = 1.0 Abundance = 1.0%

#### Monoisotopic Mass, Odd and Even Electron Ions

25 formula(e) evaluated with 1 results within limits (up to 50 closest results for each mass)

Micromass : Q-ToF micro (YA-105)

Dept. Of Chemistry I.I.T.(B)

13-Jun-2011 12:45:20

C<sub>24</sub>H<sub>22</sub>O<sub>6</sub>Se

HBS-KS-37 51 (0.504) AM (Top,5, Ht,5000.0,556.28,1.00); Sm (Md, 6.00); Sb (5,40.00); Cm (36:71)

TOF MS ES+  
2.93e3

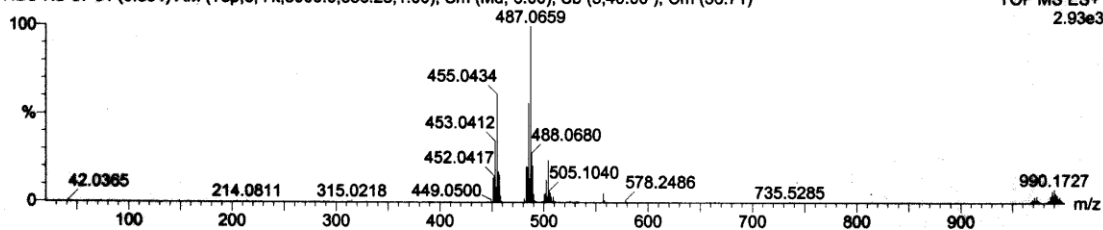

Minimum:

Maximum:

200.0 20.0 -1.5

50.0

| Mass | Calc. Mass | mDa | PPM | DBE | Score | Formula |
|------|------------|-----|-----|-----|-------|---------|
|------|------------|-----|-----|-----|-------|---------|

|          |          |     |      |      |   |                                                   |
|----------|----------|-----|------|------|---|---------------------------------------------------|
| 487.0659 | 487.0660 | 0.0 | -0.1 | 14.5 | 1 | C <sub>24</sub> H <sub>23</sub> O <sub>6</sub> Se |
|----------|----------|-----|------|------|---|---------------------------------------------------|

Fig. S39 ES-HRMS spectrum of 37



### Eager 300 Report

Page: 1 Sample: KS-47 (KS-47)

Method Name : SP291009  
Method File : D:\CHNS2008\SP291009.mth  
Chromatogram : KS-47  
Operator ID : MP  
Analysed : 10/29/2009 15:05  
Sample ID : KS-47 (# 28)  
Analysis Type : UnkNown (Area)

Company Name : C.E. Instruments  
Printed : 10/29/2009 16:35  
Instrument N. : Instrument #1  
Sample weight : 1.395

Calib. method : using 'K Factors'

!!! Warning missing one or more peaks.

| Element Name | %       | Ret.Time | Area    | BC | Area ratio | K factor    |
|--------------|---------|----------|---------|----|------------|-------------|
| 1            | 0.0000  | 18       | 11162   | RS |            | 0.0000      |
| Carbon       | 58.9126 | 66       | 2033545 | RS | 1.000000   | .247095E+07 |
| Hydrogen     | 4.6161  | 172      | 366071  | RS | 5.555056   | .552060E+07 |
| Totals       | 63.5287 |          | 2410778 |    |            |             |

Fig. S40 Elemental analysis for 37

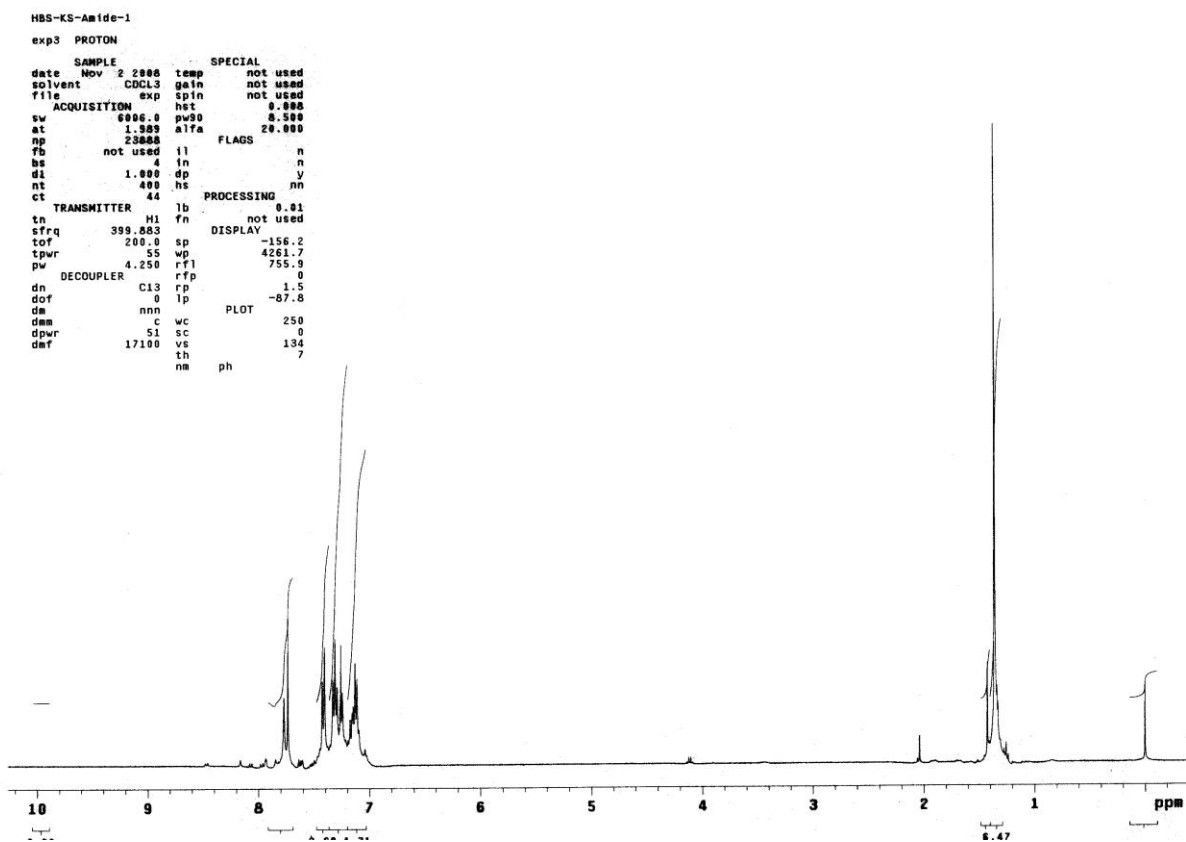

Fig. S41  $^1\text{H}$  NMR spectrum of **38**

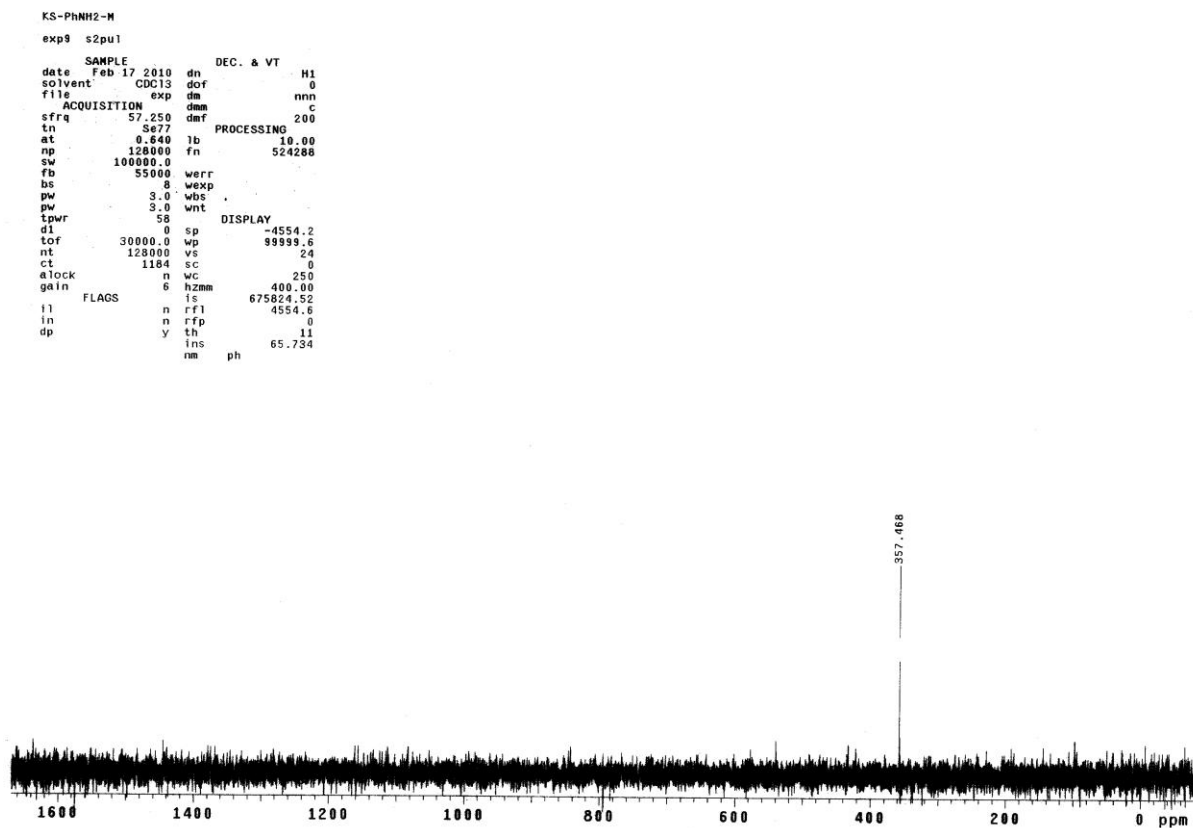

Fig. S42  $^{77}\text{Se}$  NMR spectrum of **38**

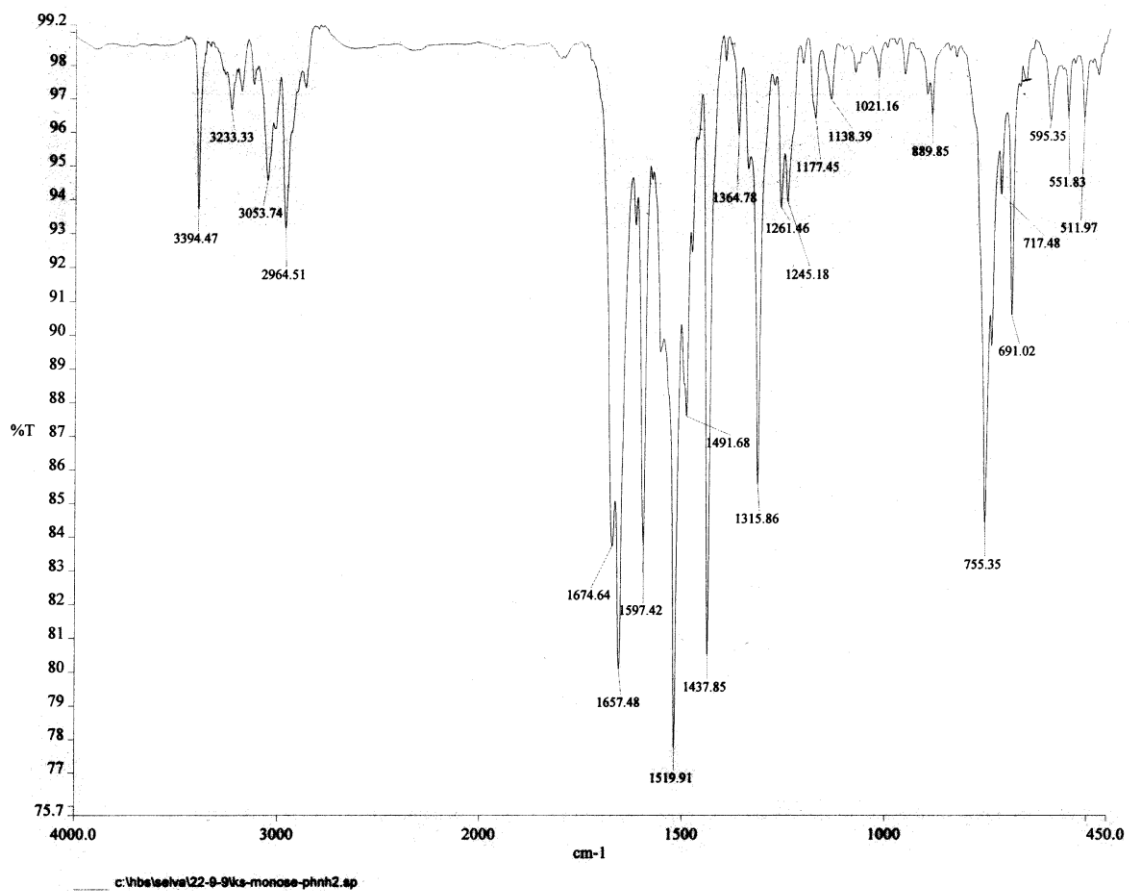

**Fig. S43** FT-IR spectrum of **38**

## Elemental Composition Report

Page 1

### Single Mass Analysis (displaying only valid results)

Tolerance = 20.0 PPM / DBE: min = -1.5, max = 50.0

Isotope cluster parameters: Separation = 1.0 Abundance = 1.0%

Monoisotopic Mass, Odd and Even Electron Ions

28 formula(e) evaluated with 1 results within limits (up to 50 closest results for each mass)

Micromass : Q-ToF micro (YA-105)

Dept. Of Chemistry I.I.T.(B)

13-Jun-201112:53:45

C<sub>30</sub>H<sub>29</sub>N<sub>2</sub>O<sub>2</sub>Se

HBS-KS-38 75 (0.749) AM (Cen,5, 80.00, Ht,5000.0,556.28,1.00); Sm (Md, 6.00); Sb (5,40.00 ); Cm (35:76)

TOF MS ES+  
2.34e3

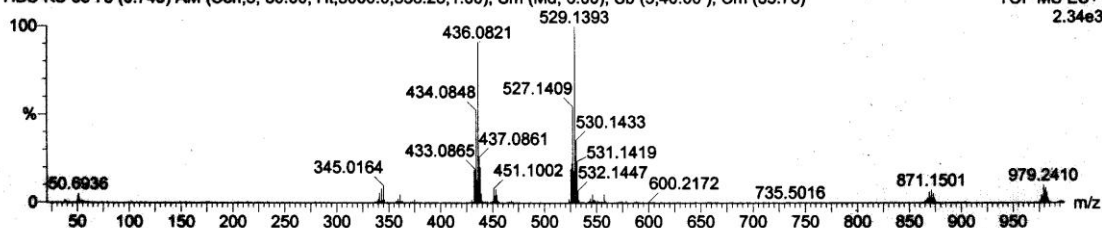

Minimum:

Maximum: 200.0 20.0 -1.5

Mass Calc. Mass mDa PPM DBE Score Formula

| Mass     | Calc. Mass | mDa  | PPM  | DBE  | Score | Formula                                                          |
|----------|------------|------|------|------|-------|------------------------------------------------------------------|
| 529.1393 | 529.1394   | -0.1 | -0.3 | 18.5 | 1     | C <sub>30</sub> H <sub>29</sub> N <sub>2</sub> O <sub>2</sub> Se |

Fig. S44 ES-HRMS spectrum of 38

## S2. GPx-Like activity of 25, 29, 30, 31, 37 and 47

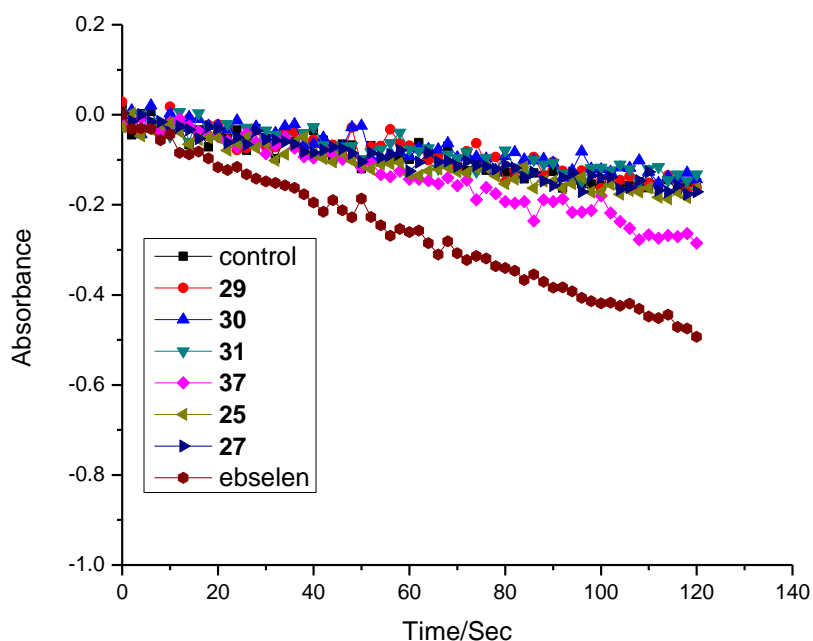

**Fig. S45.** Figure showing the decrease of absorbance (Depletion of NADH concentration) with respect to time at 340 nm.

**Table S1.** Glutathione peroxides like activity of control

| S.No | $\Delta A/\text{Min}$ | Initial reaction rates<br>( $\mu\text{M min}^{-1}$ ) | Initial reaction rate ( $\mu\text{M min}^{-1}$ ) |
|------|-----------------------|------------------------------------------------------|--------------------------------------------------|
| 1    | 0.064                 | 10.29                                                |                                                  |
| 2    | 0.068                 | 10.93                                                | $10.56 \pm 0.33$                                 |
| 3    | 0.065                 | 10.45                                                |                                                  |

**Table S2.** Glutathione peroxides like activity of ebselen

| S.No | $\Delta A/\text{Min}$ | Initial reaction rates<br>( $\mu\text{M min}^{-1}$ ) | Initial reaction rate ( $\mu\text{M min}^{-1}$ ) |
|------|-----------------------|------------------------------------------------------|--------------------------------------------------|
| 1    | 0.229                 | 36.82                                                |                                                  |
| 2    | 0.226                 | 36.33                                                | $35.69 \pm 1.55$                                 |
| 3    | 0.211                 | 33.92                                                |                                                  |

**Table S3.** Glutathione peroxides like activity of **25**

| S.No | $\Delta A/\text{Min}$ | Initial reaction rates<br>( $\mu\text{M min}^{-1}$ ) | Initial reaction rate ( $\mu\text{M min}^{-1}$ ) |
|------|-----------------------|------------------------------------------------------|--------------------------------------------------|
| 1    | 0.080                 | 12.86                                                |                                                  |
| 2    | 0.079                 | 12.86                                                | $12.91 \pm 0.09$                                 |
| 3    | 0.081                 | 13.02                                                |                                                  |

**Table S4.** Glutathione peroxides like activity of **27**

| S.No | $\Delta A/\text{Min}$ | Initial reaction rates<br>( $\mu\text{M min}^{-1}$ ) | Initial reaction rate ( $\mu\text{M min}^{-1}$ ) |
|------|-----------------------|------------------------------------------------------|--------------------------------------------------|
| 1    | 0.083                 | 13.34                                                |                                                  |
| 2    | 0.080                 | 12.86                                                | $12.80 \pm 0.57$                                 |
| 3    | 0.076                 | 12.21                                                |                                                  |

**Table S5.** Glutathione peroxides like activity of **29**

| S.No | $\Delta A/\text{Min}$ | Initial reaction rates<br>( $\mu\text{M min}^{-1}$ ) | Initial reaction rate ( $\mu\text{M min}^{-1}$ ) |
|------|-----------------------|------------------------------------------------------|--------------------------------------------------|
| 1    | 0.072                 | 11.58                                                |                                                  |
| 2    | 0.083                 | 13.34                                                | $12.54 \pm 0.89$                                 |
| 3    | 0.079                 | 12.70                                                |                                                  |

**Table S6.** Glutathione peroxides like activity of **30**

| S.No | $\Delta A/\text{Min}$ | Initial reaction rates<br>( $\mu\text{M min}^{-1}$ ) | Initial reaction rate ( $\mu\text{M min}^{-1}$ ) |
|------|-----------------------|------------------------------------------------------|--------------------------------------------------|
| 1    | 0.084                 | 13.50                                                |                                                  |
| 2    | 0.082                 | 13.18                                                | $13.07 \pm 0.49$                                 |
| 3    | 0.078                 | 12.54                                                |                                                  |

**Table S7.** Glutathione peroxides like activity of **31**

| S.No | $\Delta A/\text{Min}$ | Initial reaction rates<br>( $\mu\text{M min}^{-1}$ ) | Initial reaction rate ( $\mu\text{M min}^{-1}$ ) |
|------|-----------------------|------------------------------------------------------|--------------------------------------------------|
| 1    | 0.073                 | 11.58                                                |                                                  |
| 2    | 0.072                 | 11.58                                                | $11.74 \pm 0.28$                                 |
| 3    | 0.075                 | 12.06                                                |                                                  |

**Table S8.** Glutathione peroxides like activity of **37**

| S.No | $\Delta A/\text{Min}$ | Initial reaction rates<br>( $\mu\text{M min}^{-1}$ ) | Initial reaction rate ( $\mu\text{M min}^{-1}$ ) |
|------|-----------------------|------------------------------------------------------|--------------------------------------------------|
| 1    | 0.132                 | 21.22                                                |                                                  |
| 2    | 0.134                 | 21.54                                                | $21.49 \pm 0.24$                                 |
| 3    | 0.135                 | 21.70                                                |                                                  |

**Table S9.** Glutathione peroxides like activity of **47**

| S.No | $\Delta A/\text{Min}$ | Initial reaction rates<br>( $\mu\text{M min}^{-1}$ ) | Initial reaction rate ( $\mu\text{M min}^{-1}$ ) |
|------|-----------------------|------------------------------------------------------|--------------------------------------------------|
| 1    | 0.116                 | 18.64                                                |                                                  |
| 2    | 0.123                 | 19.77                                                | $19.34 \pm 0.61$                                 |
| 3    | 0.122                 | 19.61                                                |                                                  |



S3. Cyclic Voltammogram (CV) of 25, 27, 29, 30, 31, 37, 38 and 47.

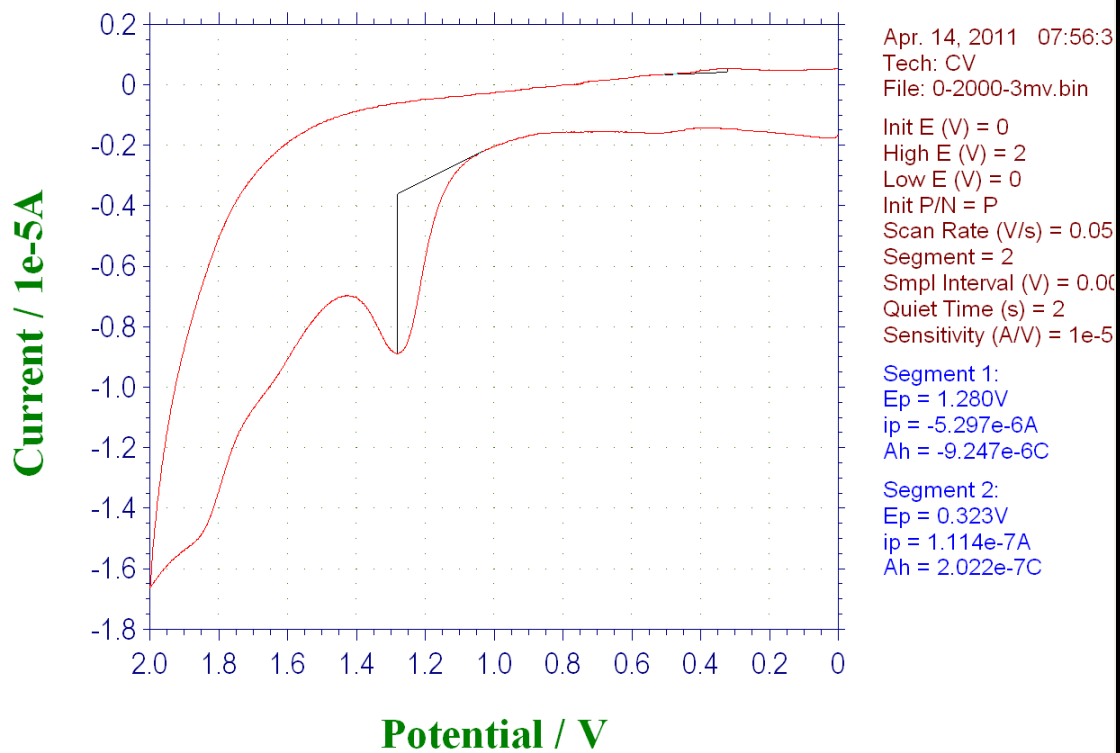

Fig. S46 CV of 25.

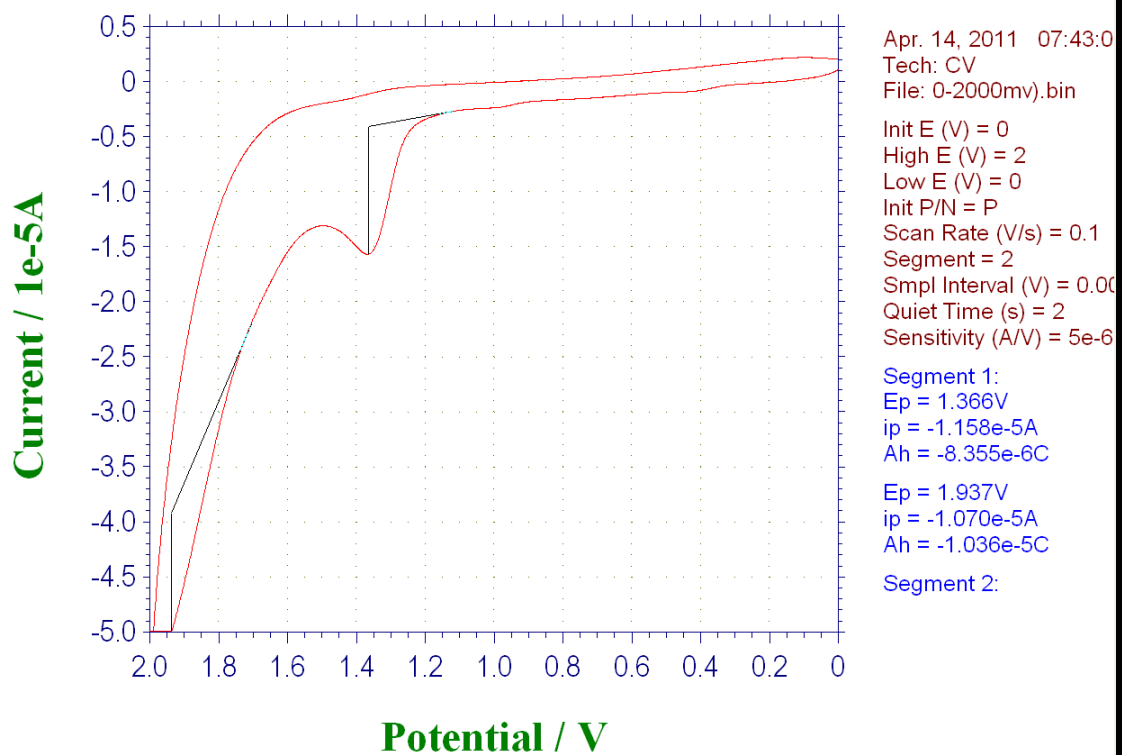

Fig. S47 CV of 27.

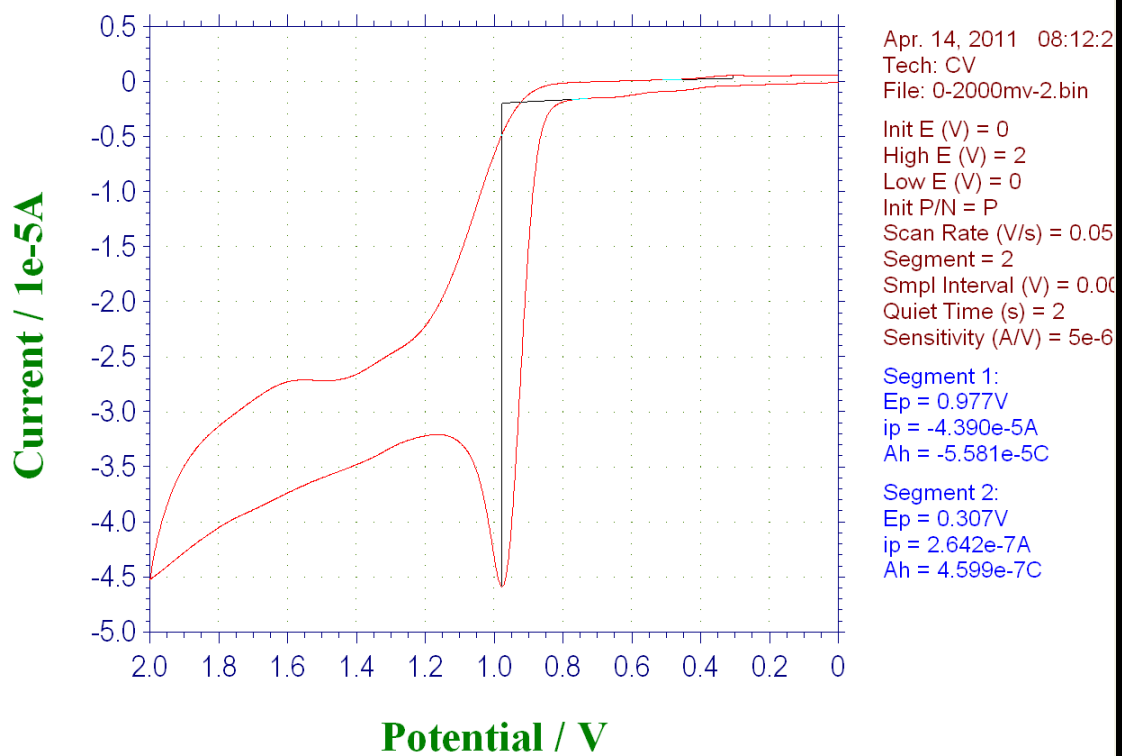

Fig. S48. CV of 29

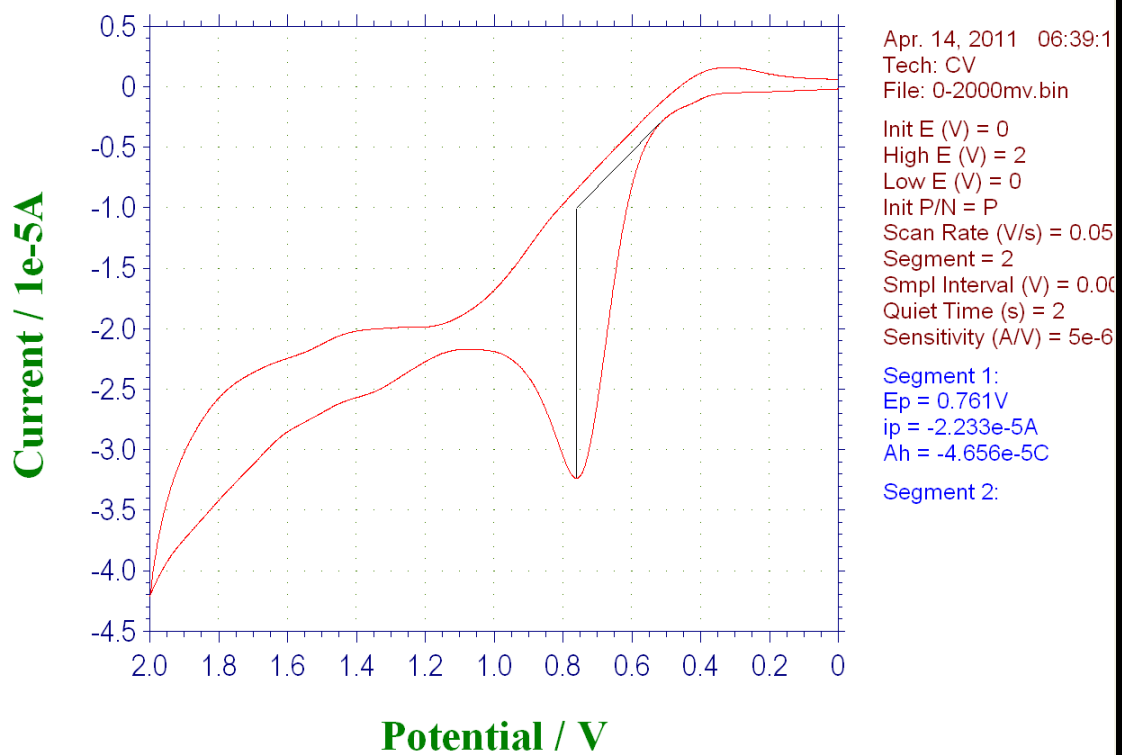

**Fig. S49** CV of **30**

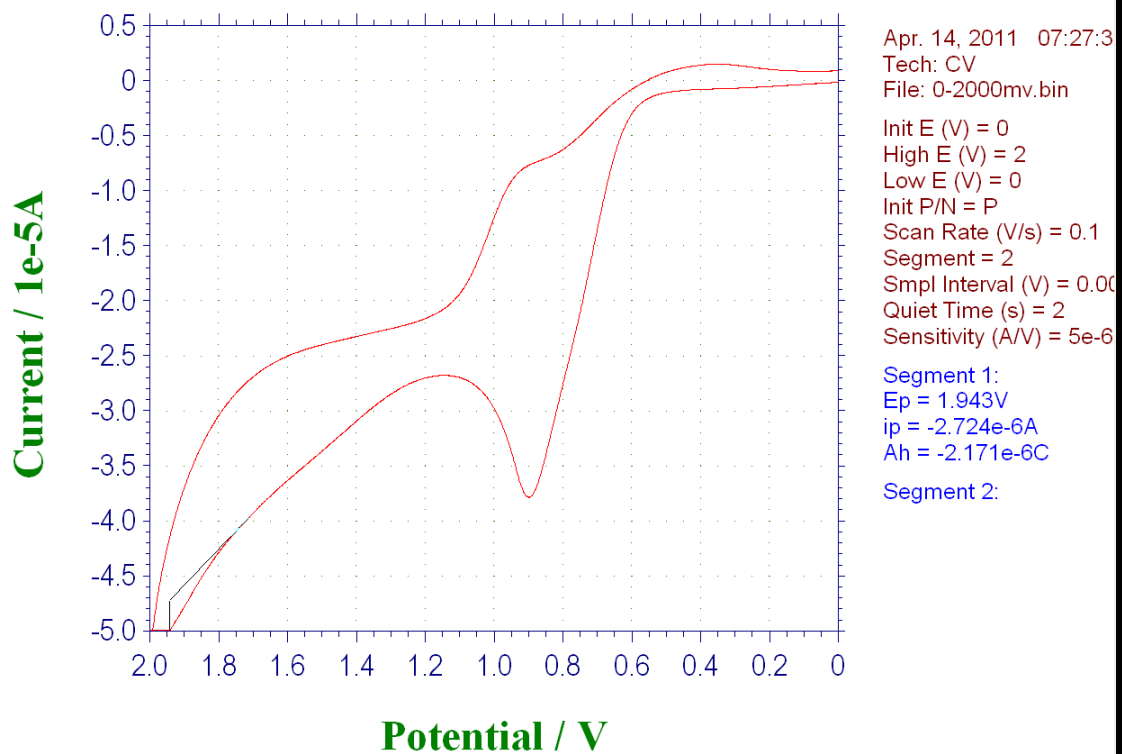

Fig. S50 CV of 31

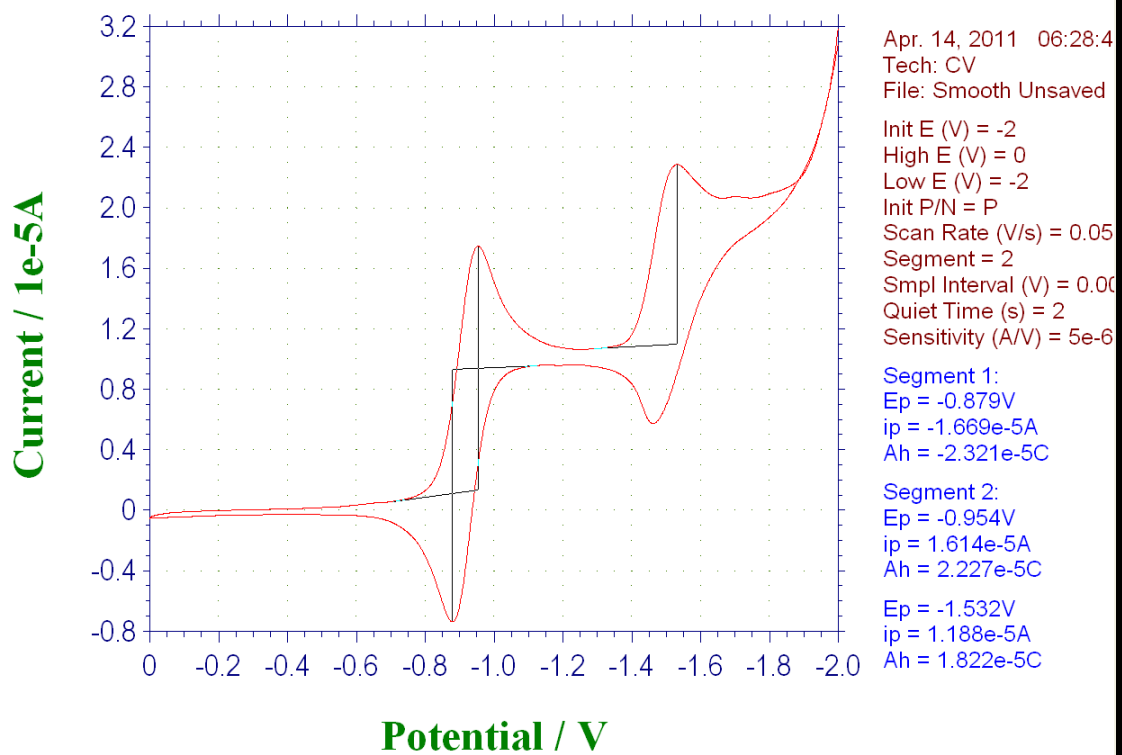

Fig. S51 CV for 37

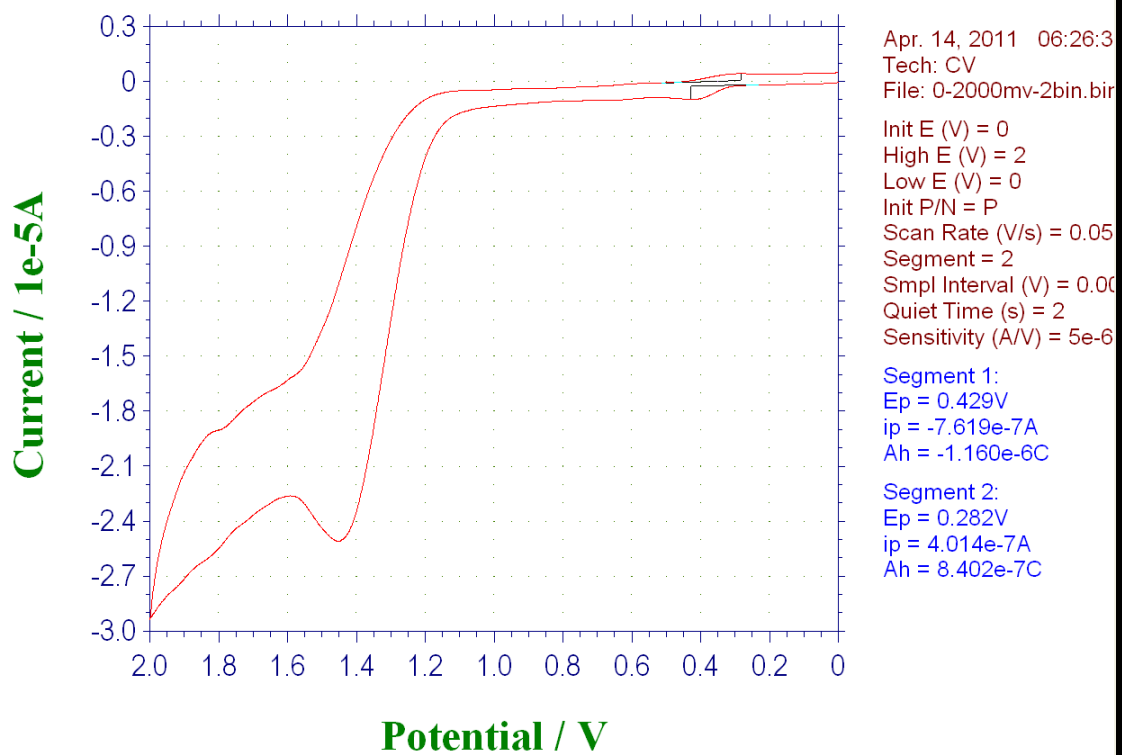

Fig. S52 CV of 37

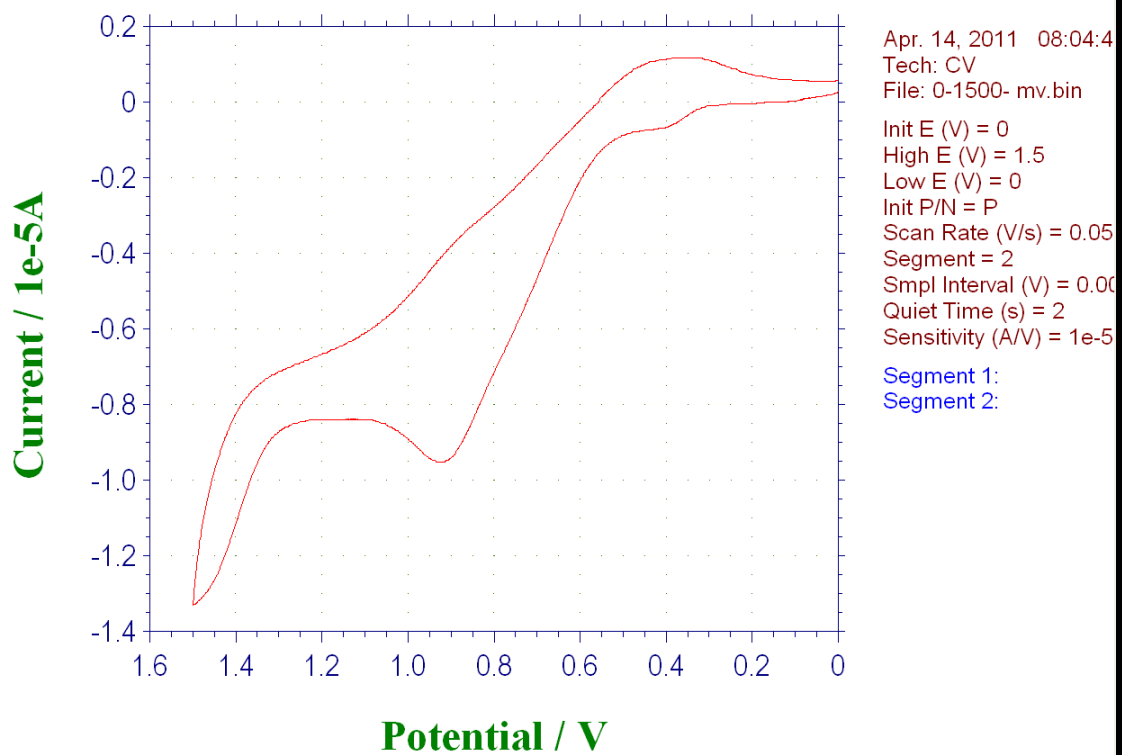

Fig. S53 CV of 38



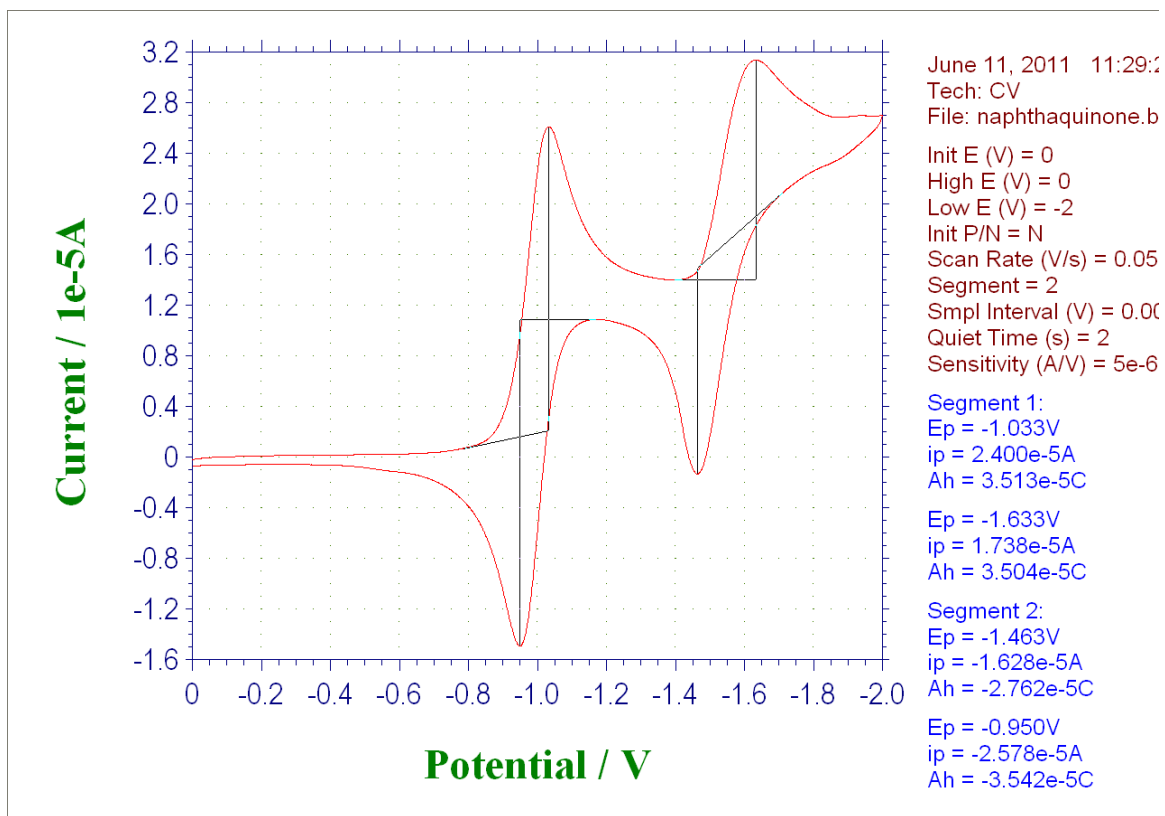

Fig. S54 CV of 47

### S4. Geometries and coordinates for the optimized molecules

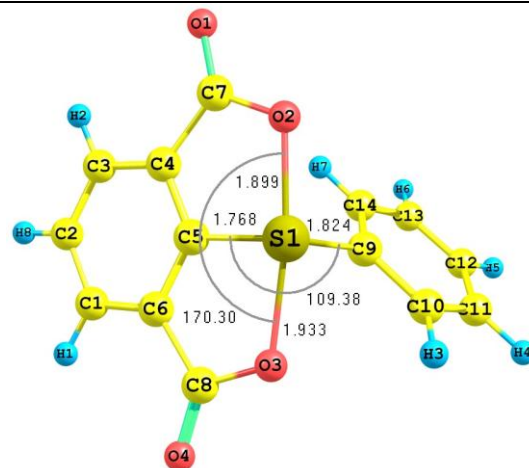

24

Electronic energy = -1237.35533758

No of imaginary frequency = 0

|    |              |              |              |
|----|--------------|--------------|--------------|
| 8  | -1.562048000 | -3.412214000 | -0.513297000 |
| 8  | -0.068402000 | -1.861235000 | -1.211884000 |
| 8  | 0.267984000  | 1.936078000  | -0.993284000 |
| 8  | -0.870454000 | 3.618013000  | 0.006325000  |
| 6  | -2.777850000 | 1.402144000  | 1.022194000  |
| 1  | -3.136909000 | 2.362937000  | 1.377935000  |
| 6  | -3.466388000 | 0.213444000  | 1.312865000  |
| 6  | -3.025744000 | -1.034653000 | 0.846331000  |
| 1  | -3.575259000 | -1.945012000 | 1.064890000  |
| 6  | -1.860057000 | -1.093330000 | 0.078715000  |
| 6  | -1.207910000 | 0.093815000  | -0.166285000 |
| 6  | -1.615653000 | 1.340393000  | 0.250511000  |
| 6  | -1.180556000 | -2.264092000 | -0.563244000 |
| 6  | -0.719128000 | 2.440154000  | -0.236292000 |
| 6  | 1.713980000  | -0.137503000 | -0.209124000 |
| 6  | 2.778701000  | 0.701385000  | -0.544672000 |
| 1  | 2.674323000  | 1.437996000  | -1.332257000 |
| 6  | 3.969583000  | 0.593225000  | 0.173672000  |
| 1  | 4.804362000  | 1.239630000  | -0.080118000 |
| 6  | 4.083923000  | -0.331289000 | 1.212771000  |
| 1  | 5.012519000  | -0.408597000 | 1.770893000  |
| 6  | 3.006681000  | -1.158468000 | 1.534757000  |
| 1  | 3.092159000  | -1.880396000 | 2.341491000  |
| 6  | 1.812879000  | -1.074649000 | 0.817585000  |
| 1  | 0.989863000  | -1.736904000 | 1.053399000  |
| 1  | -4.372866000 | 0.262546000  | 1.909164000  |
| 16 | 0.206275000  | 0.017451000  | -1.224187000 |

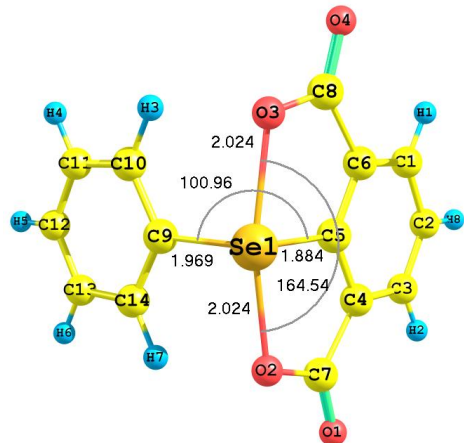

**25a**

Electronic Energy = -3238.58513312  
No of imaginary frequency = 0

|    |              |              |              |
|----|--------------|--------------|--------------|
| 8  | -1.287066000 | -3.555131000 | -0.023679000 |
| 8  | -0.054306000 | -2.005520000 | -1.110019000 |
| 8  | -0.051208000 | 2.005687000  | -1.109266000 |
| 8  | -1.280771000 | 3.556821000  | -0.021483000 |
| 6  | -2.785269000 | 1.229114000  | 1.276486000  |
| 1  | -3.200452000 | 2.171934000  | 1.619094000  |
| 6  | -3.303594000 | 0.002094000  | 1.718573000  |
| 6  | -2.787439000 | -1.225570000 | 1.275747000  |
| 1  | -3.204293000 | -2.167866000 | 1.617766000  |
| 6  | -1.724397000 | -1.225580000 | 0.368568000  |
| 6  | -1.235894000 | 0.000798000  | -0.014244000 |
| 6  | -1.722257000 | 1.227804000  | 0.369278000  |
| 6  | -1.017147000 | -2.395839000 | -0.254130000 |
| 6  | -1.012999000 | 2.397199000  | -0.252761000 |
| 6  | 1.735400000  | -0.001184000 | -0.100205000 |
| 6  | 2.307545000  | 1.217249000  | 0.268609000  |
| 1  | 1.874283000  | 2.153140000  | -0.059283000 |
| 6  | 3.452567000  | 1.205076000  | 1.067610000  |
| 1  | 3.898328000  | 2.149349000  | 1.366714000  |
| 6  | 4.020139000  | -0.002612000 | 1.474527000  |
| 1  | 4.911940000  | -0.003171000 | 2.094862000  |
| 6  | 3.447820000  | -1.209622000 | 1.072272000  |
| 1  | 3.889900000  | -2.154472000 | 1.374996000  |
| 6  | 2.302799000  | -1.220401000 | 0.273251000  |
| 1  | 1.866226000  | -2.155852000 | -0.051455000 |
| 1  | -4.133122000 | 0.002614000  | 2.419682000  |
| 34 | 0.159422000  | -0.000050000 | -1.280244000 |

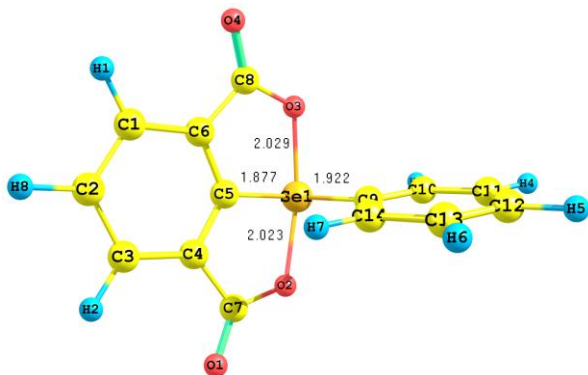

**25b**

Electronic energy = -3238.58430957

No of imaginary frequency = 1 (-9.66)

|    |              |              |              |
|----|--------------|--------------|--------------|
| 34 | 0.235692000  | 0.001974000  | -1.222330000 |
| 8  | -1.445900000 | -3.504165000 | -0.150634000 |
| 8  | -0.021933000 | -1.997480000 | -1.051474000 |
| 8  | 0.166008000  | 2.012983000  | -0.958975000 |
| 8  | -1.077342000 | 3.598299000  | 0.064758000  |
| 6  | -2.862271000 | 1.328687000  | 1.072833000  |
| 1  | -3.256219000 | 2.282885000  | 1.409113000  |
| 6  | -3.488444000 | 0.119545000  | 1.417192000  |
| 6  | -2.990955000 | -1.125795000 | 1.000579000  |
| 1  | -3.483317000 | -2.052068000 | 1.280441000  |
| 6  | -1.839619000 | -1.162837000 | 0.208995000  |
| 6  | -1.266389000 | 0.049099000  | -0.097706000 |
| 6  | -1.712295000 | 1.293705000  | 0.279927000  |
| 6  | -1.099238000 | -2.356973000 | -0.340438000 |
| 6  | -0.853656000 | 2.435813000  | -0.203646000 |
| 6  | 1.729160000  | -0.068558000 | -0.015082000 |
| 6  | 2.980581000  | 0.155044000  | -0.585431000 |
| 1  | 3.072967000  | 0.369620000  | -1.645976000 |
| 6  | 4.112773000  | 0.111465000  | 0.229082000  |
| 1  | 5.093071000  | 0.287445000  | -0.203530000 |
| 6  | 3.979750000  | -0.158190000 | 1.591567000  |
| 1  | 4.861212000  | -0.193070000 | 2.225181000  |
| 6  | 2.716794000  | -0.386144000 | 2.144303000  |
| 1  | 2.615979000  | -0.598666000 | 3.204558000  |
| 6  | 1.577622000  | -0.345013000 | 1.341293000  |
| 1  | 0.598153000  | -0.527918000 | 1.769256000  |
| 1  | -4.384937000 | 0.148492000  | 2.029968000  |

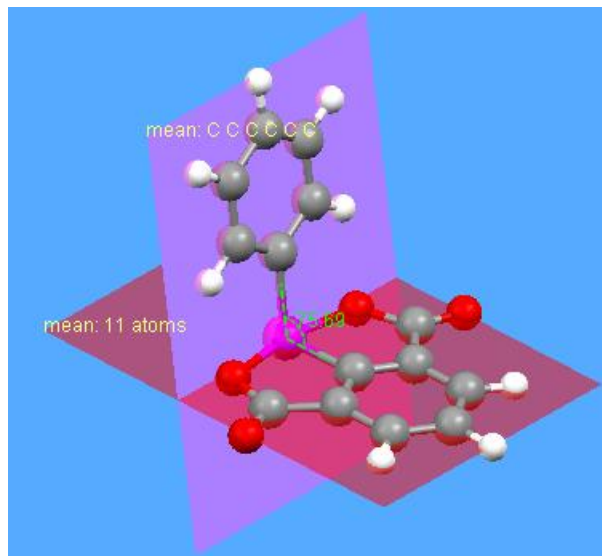

**25a**

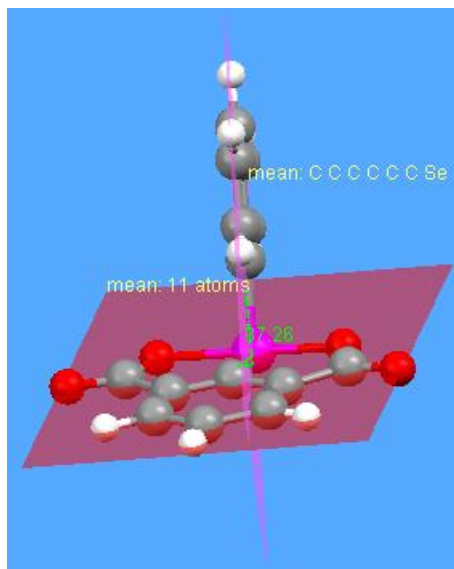

**25b**

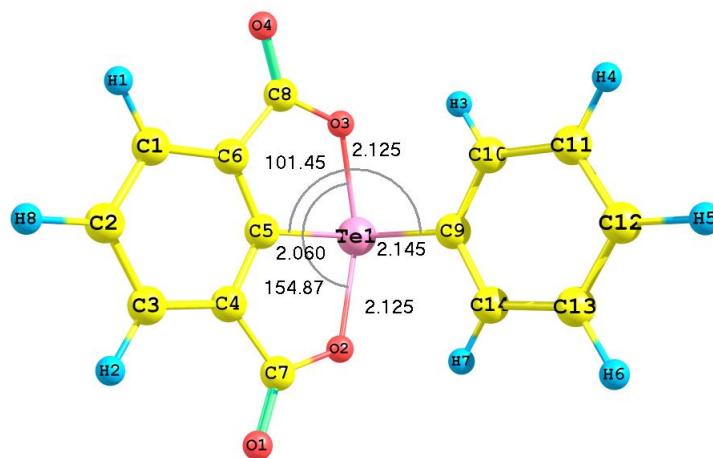

44

Electronic Energy = -847.229912178

No of imaginary frequency = 0

|    |              |              |              |
|----|--------------|--------------|--------------|
| 8  | 1.388749000  | 3.566448000  | 0.203331000  |
| 8  | 0.100186000  | 2.074450000  | -0.896142000 |
| 8  | 0.100218000  | -2.074439000 | -0.895985000 |
| 8  | 1.388880000  | -3.566378000 | 0.203459000  |
| 6  | 2.903298000  | -1.228194000 | 1.409118000  |
| 1  | 3.301983000  | -2.170177000 | 1.773190000  |
| 6  | 3.420950000  | 0.000131000  | 1.849492000  |
| 6  | 2.903254000  | 1.228402000  | 1.409022000  |
| 1  | 3.301904000  | 2.170430000  | 1.773015000  |
| 6  | 1.847438000  | 1.228320000  | 0.490739000  |
| 6  | 1.385559000  | 0.000034000  | 0.074844000  |
| 6  | 1.847479000  | -1.228210000 | 0.490838000  |
| 6  | 1.109024000  | 2.418516000  | -0.069170000 |
| 6  | 1.109131000  | -2.418455000 | -0.068988000 |
| 6  | -1.870201000 | -0.000017000 | 0.058210000  |
| 6  | -2.423545000 | -1.219893000 | 0.452614000  |
| 1  | -1.981675000 | -2.156488000 | 0.130680000  |
| 6  | -3.547633000 | -1.209787000 | 1.282222000  |
| 1  | -3.981821000 | -2.152421000 | 1.603292000  |
| 6  | -4.107308000 | 0.000074000  | 1.696956000  |
| 1  | -4.982147000 | 0.000116000  | 2.341217000  |
| 6  | -3.547626000 | 1.209892000  | 1.282097000  |
| 1  | -3.981797000 | 2.152556000  | 1.603100000  |
| 6  | -2.423550000 | 1.219905000  | 0.452474000  |
| 1  | -1.981672000 | 2.156458000  | 0.130425000  |
| 1  | 4.241656000  | 0.000173000  | 2.561184000  |
| 52 | -0.180737000 | -0.000108000 | -1.263389000 |

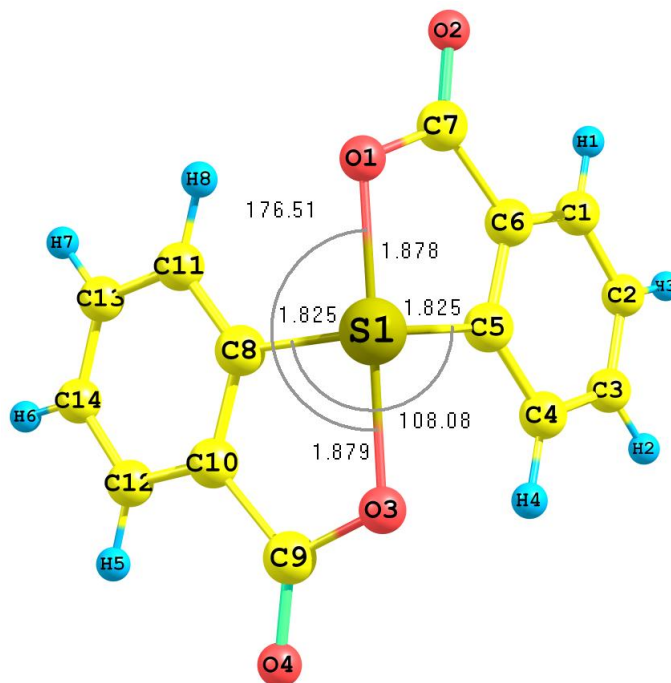

45

Electronic Energy = -1237.36672906

No of imaginary frequency = 0

|    |              |              |              |
|----|--------------|--------------|--------------|
| 8  | 0.847769000  | -1.675244000 | -1.183904000 |
| 8  | 2.694595000  | -2.696878000 | -0.381272000 |
| 6  | 3.416661000  | -0.077082000 | 0.859803000  |
| 1  | 4.140473000  | -0.862394000 | 1.053766000  |
| 6  | 3.576526000  | 1.218980000  | 1.347287000  |
| 6  | 2.622331000  | 2.202712000  | 1.063659000  |
| 1  | 2.758637000  | 3.212156000  | 1.440644000  |
| 6  | 1.491333000  | 1.915331000  | 0.293043000  |
| 6  | 1.344815000  | 0.610699000  | -0.169723000 |
| 6  | 2.291027000  | -0.374290000 | 0.093400000  |
| 6  | 1.999657000  | -1.710783000 | -0.494259000 |
| 1  | 4.447940000  | 1.469870000  | 1.945014000  |
| 16 | 0.000211000  | -0.000364000 | -1.241307000 |
| 1  | 0.762027000  | 2.678069000  | 0.055829000  |
| 6  | -1.344836000 | -0.610898000 | -0.169731000 |
| 8  | -0.847787000 | 1.675304000  | -1.184321000 |
| 6  | -1.999427000 | 1.710796000  | -0.494549000 |
| 6  | -2.290935000 | 0.374250000  | 0.093075000  |
| 8  | -2.694445000 | 2.696869000  | -0.381206000 |
| 6  | -1.491647000 | -1.915446000 | 0.293271000  |

|   |              |              |             |
|---|--------------|--------------|-------------|
| 6 | -3.416615000 | 0.077403000  | 0.859520000 |
| 6 | -2.622730000 | -2.202473000 | 1.063850000 |
| 6 | -3.576738000 | -1.218515000 | 1.347284000 |
| 1 | -4.140180000 | 0.862992000  | 1.053270000 |
| 1 | -4.448162000 | -1.469113000 | 1.945118000 |
| 1 | -2.759254000 | -3.211865000 | 1.440900000 |
| 1 | -0.762447000 | -2.678403000 | 0.056422000 |

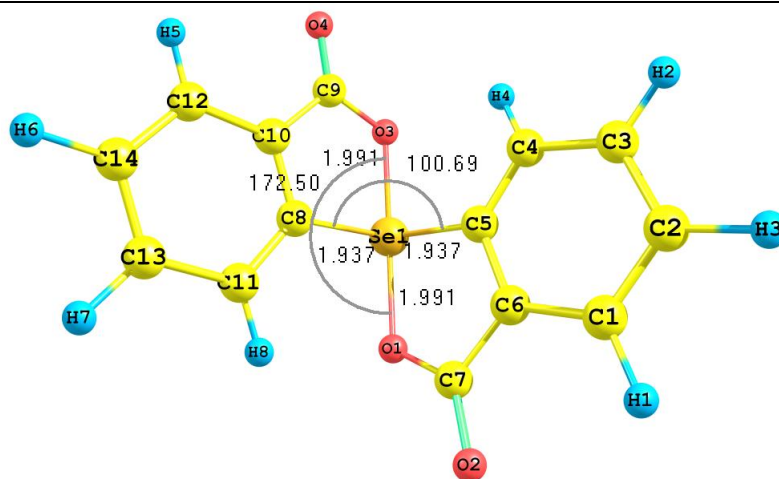

**1**

Electronic Energy = -3238.59664811

No of imaginary frequency = 0

|   |              |              |              |
|---|--------------|--------------|--------------|
| 8 | -2.831346000 | 2.594285000  | -0.129846000 |
| 6 | -3.341458000 | -0.027532000 | 1.115380000  |
| 1 | -4.072702000 | 0.738914000  | 1.352613000  |
| 6 | -3.430217000 | -1.320273000 | 1.630738000  |
| 6 | -2.471348000 | -2.283741000 | 1.297903000  |
| 1 | -2.553194000 | -3.290168000 | 1.698149000  |
| 6 | -1.405314000 | -1.973292000 | 0.447393000  |
| 6 | -1.330889000 | -0.673324000 | -0.036111000 |
| 6 | -2.284664000 | 0.292970000  | 0.263261000  |
| 6 | -2.096701000 | 1.651692000  | -0.337837000 |
| 1 | -4.251245000 | -1.584069000 | 2.291049000  |
| 1 | -0.665671000 | -2.715369000 | 0.173220000  |
| 6 | 1.330776000  | 0.673050000  | -0.035875000 |
| 8 | 1.026528000  | -1.701702000 | -1.141416000 |
| 6 | 2.096990000  | -1.651891000 | -0.337322000 |
| 6 | 2.284776000  | -0.292980000 | 0.263513000  |
| 8 | 2.832120000  | -2.594115000 | -0.129452000 |
| 6 | 1.404531000  | 1.973164000  | 0.447348000  |
| 6 | 3.341481000  | 0.028187000  | 1.115520000  |
| 6 | 2.470353000  | 2.284167000  | 1.297850000  |



|    |             |              |              |
|----|-------------|--------------|--------------|
| 6  | 3.429616000 | 1.321053000  | 1.630695000  |
| 1  | 4.073082000 | -0.737829000 | 1.353028000  |
| 1  | 4.250543000 | 1.585279000  | 2.290960000  |
| 1  | 2.551941000 | 3.290635000  | 1.698045000  |
| 1  | 0.664178000 | 2.714419000  | 0.172779000  |
| 34 | 0.000313000 | -0.000135000 | -1.272288000 |

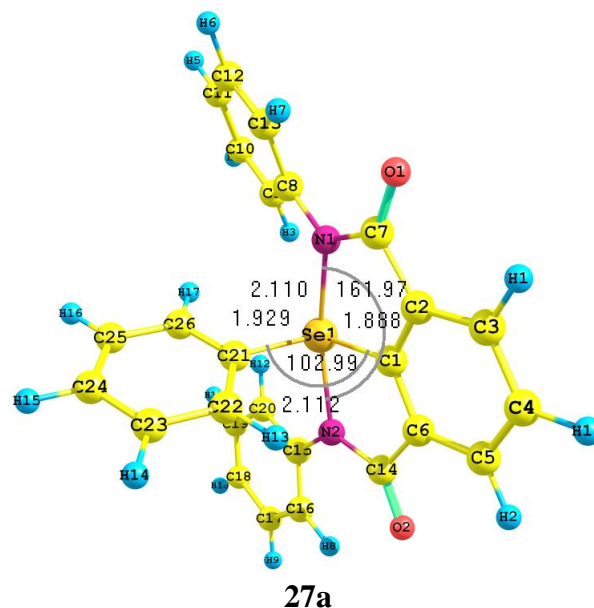

Electronic Energy = -3660.94345754

No of imaginary frequency = 0

|    |              |              |              |
|----|--------------|--------------|--------------|
| 34 | 0.020278000  | 0.086907000  | -0.568886000 |
| 8  | -3.492521000 | 2.282556000  | -0.145668000 |
| 8  | 3.662753000  | 2.083879000  | -0.323796000 |
| 7  | -2.051859000 | 0.469774000  | -0.465670000 |
| 7  | 2.115424000  | 0.328225000  | -0.454569000 |
| 6  | 0.078299000  | 1.957328000  | -0.321340000 |
| 6  | -1.126649000 | 2.620385000  | -0.196242000 |
| 6  | -1.076949000 | 4.005806000  | -0.023340000 |
| 1  | -2.006679000 | 4.557352000  | 0.074412000  |
| 6  | 0.168182000  | 4.647148000  | 0.023717000  |
| 6  | 1.368610000  | 3.932608000  | -0.085571000 |
| 1  | 2.333486000  | 4.427104000  | -0.035087000 |
| 6  | 1.325211000  | 2.546162000  | -0.255598000 |
| 6  | -2.373055000 | 1.786861000  | -0.257810000 |
| 6  | -2.992902000 | -0.559779000 | -0.661699000 |
| 6  | -2.628514000 | -1.675011000 | -1.440167000 |
| 1  | -1.651902000 | -1.702246000 | -1.914895000 |
| 6  | -3.518752000 | -2.728430000 | -1.639556000 |

|   |              |              |              |
|---|--------------|--------------|--------------|
| 1 | -3.215703000 | -3.574038000 | -2.251722000 |
| 6 | -4.792518000 | -2.692197000 | -1.071003000 |
| 1 | -5.489482000 | -3.510082000 | -1.230145000 |
| 6 | -5.161159000 | -1.586389000 | -0.302377000 |
| 1 | -6.151713000 | -1.542111000 | 0.143256000  |
| 6 | -4.278526000 | -0.528777000 | -0.089935000 |
| 1 | -4.577133000 | 0.330438000  | 0.494594000  |
| 6 | 2.516434000  | 1.637320000  | -0.352850000 |
| 6 | 2.975164000  | -0.779738000 | -0.602097000 |
| 6 | 4.374339000  | -0.697679000 | -0.450586000 |
| 1 | 4.825994000  | 0.258800000  | -0.232019000 |
| 6 | 5.160331000  | -1.839640000 | -0.596208000 |
| 1 | 6.237302000  | -1.750643000 | -0.476971000 |
| 6 | 4.593418000  | -3.080168000 | -0.890583000 |
| 1 | 5.217843000  | -3.961885000 | -1.003040000 |
| 6 | 3.209475000  | -3.168015000 | -1.041253000 |
| 1 | 2.741500000  | -4.120822000 | -1.275197000 |
| 6 | 2.411984000  | -2.036583000 | -0.896140000 |
| 1 | 1.339548000  | -2.127490000 | -1.032551000 |
| 6 | -0.038958000 | -0.587791000 | 1.237088000  |
| 6 | 0.382825000  | 0.186297000  | 2.315180000  |
| 1 | 0.754149000  | 1.193801000  | 2.167392000  |
| 6 | 0.324446000  | -0.361182000 | 3.596192000  |
| 1 | 0.648146000  | 0.233303000  | 4.445542000  |
| 6 | -0.142077000 | -1.664074000 | 3.787569000  |
| 1 | -0.181651000 | -2.083955000 | 4.788518000  |
| 6 | -0.553110000 | -2.427113000 | 2.695018000  |
| 1 | -0.915123000 | -3.440946000 | 2.837689000  |
| 6 | -0.501110000 | -1.891511000 | 1.407002000  |
| 1 | -0.835456000 | -2.478727000 | 0.559028000  |
| 1 | 0.203992000  | 5.724809000  | 0.156247000  |

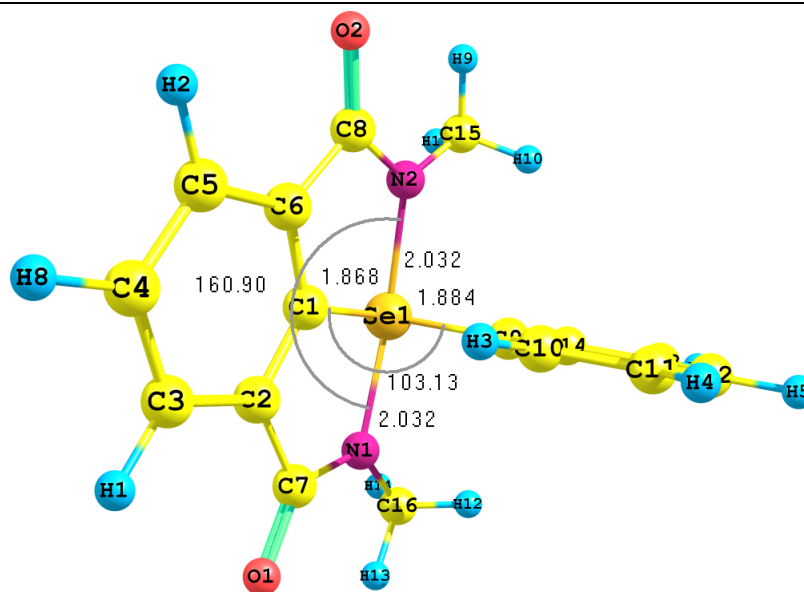

**27b**

Electronic Energy = -3269.98027899

No of imaginary frequency = 0

|    |              |              |              |
|----|--------------|--------------|--------------|
| 34 | -0.222588000 | -0.000222000 | -1.103384000 |
| 8  | 1.397913000  | 3.571504000  | 0.091312000  |
| 8  | 1.404120000  | -3.569508000 | 0.090049000  |
| 7  | -0.033180000 | 2.003471000  | -0.825538000 |
| 7  | -0.029946000 | -2.003554000 | -0.825694000 |
| 6  | 1.348552000  | 0.001008000  | -0.093331000 |
| 6  | 1.875424000  | 1.224998000  | 0.245805000  |
| 6  | 3.055869000  | 1.223070000  | 0.979607000  |
| 1  | 3.493531000  | 2.184816000  | 1.271557000  |
| 6  | 3.639190000  | 0.002740000  | 1.328096000  |
| 6  | 3.058031000  | -1.218485000 | 0.979125000  |
| 1  | 3.497389000  | -2.179582000 | 1.270664000  |
| 6  | 1.877581000  | -1.222189000 | 0.245332000  |
| 6  | 1.076633000  | 2.411107000  | -0.163469000 |
| 6  | 1.080764000  | -2.409567000 | -0.164236000 |
| 6  | -1.574847000 | -0.001158000 | 0.208592000  |
| 6  | -1.276865000 | -0.003215000 | 1.562655000  |
| 1  | -0.233442000 | -0.004390000 | 1.899751000  |
| 6  | -2.327539000 | -0.003807000 | 2.468316000  |
| 1  | -2.113599000 | -0.005365000 | 3.542649000  |
| 6  | -3.647372000 | -0.002495000 | 2.021166000  |
| 1  | -4.467916000 | -0.002981000 | 2.746725000  |
| 6  | -3.926171000 | -0.000693000 | 0.660907000  |
| 1  | -4.962596000 | 0.000157000  | 0.306492000  |
| 6  | -2.880995000 | -0.000087000 | -0.258311000 |

|   |              |              |              |
|---|--------------|--------------|--------------|
| 1 | -3.076377000 | 0.001197000  | -1.337586000 |
| 1 | 4.571237000  | 0.003454000  | 1.904433000  |
| 6 | -0.989897000 | -2.940188000 | -1.299120000 |
| 1 | -0.667892000 | -3.947049000 | -0.973861000 |
| 1 | -1.995062000 | -2.729154000 | -0.881125000 |
| 1 | -1.069047000 | -2.933893000 | -2.403463000 |
| 6 | -0.994379000 | 2.938896000  | -1.298826000 |
| 1 | -1.999156000 | 2.726992000  | -0.880288000 |
| 1 | -0.673324000 | 3.946171000  | -0.973885000 |
| 1 | -1.074003000 | 2.932176000  | -2.403126000 |

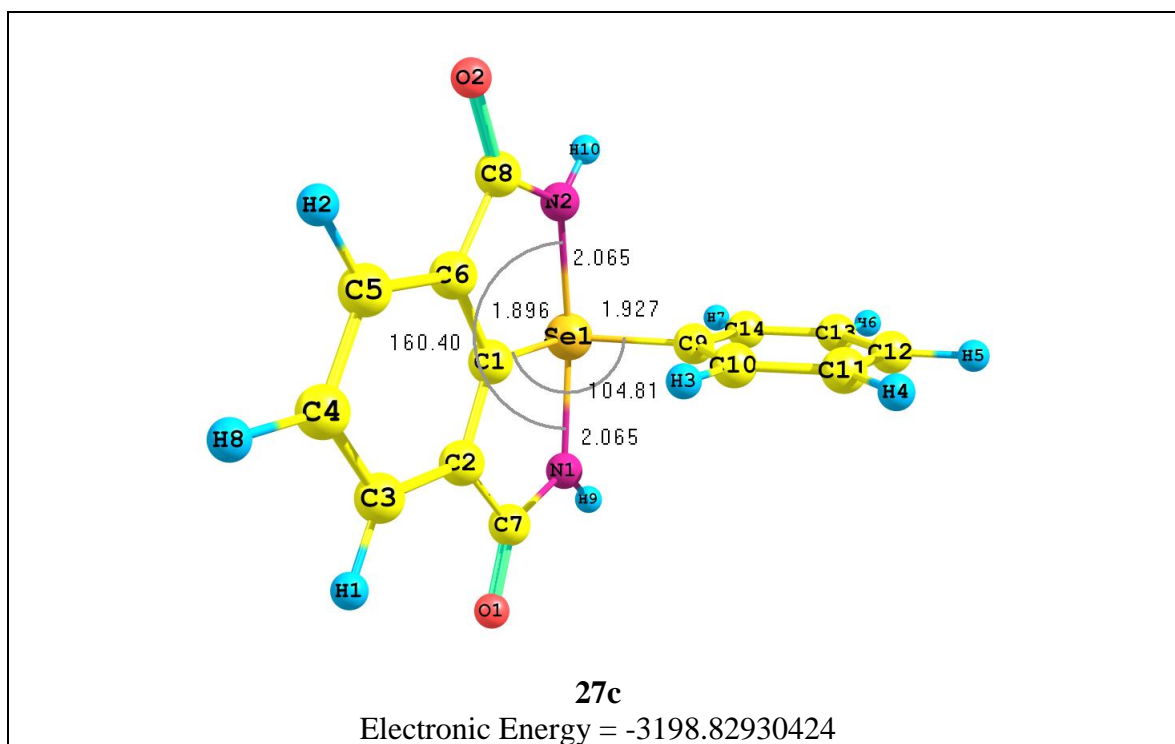

| No of imaginary frequency = 0 |              |              |              |
|-------------------------------|--------------|--------------|--------------|
| 34                            | 0.273575000  | -0.000101000 | -1.226868000 |
| 8                             | -1.399666000 | -3.591249000 | -0.027124000 |
| 8                             | -1.399194000 | 3.591489000  | -0.026439000 |
| 7                             | 0.060565000  | -2.034579000 | -0.947346000 |
| 7                             | 0.061008000  | 2.034896000  | -0.946938000 |
| 6                             | -1.261603000 | 0.000126000  | -0.114818000 |
| 6                             | -1.791011000 | -1.228963000 | 0.232756000  |
| 6                             | -2.953518000 | -1.224310000 | 1.005885000  |
| 1                             | -3.395005000 | -2.171544000 | 1.300002000  |
| 6                             | -3.524202000 | 0.000252000  | 1.380450000  |
| 6                             | -2.953262000 | 1.224722000  | 1.006049000  |
| 1                             | -3.394500000 | 2.172044000  | 1.300256000  |
| 6                             | -1.790726000 | 1.229247000  | 0.232926000  |
| 6                             | -1.036205000 | -2.440268000 | -0.253010000 |
| 6                             | -1.035702000 | 2.440535000  | -0.252638000 |
| 6                             | 1.764997000  | -0.000121000 | -0.007393000 |
| 6                             | 1.602299000  | -0.001097000 | 1.375405000  |
| 1                             | 0.612545000  | -0.001734000 | 1.818455000  |
| 6                             | 2.739972000  | -0.001187000 | 2.181147000  |
| 1                             | 2.629005000  | -0.001929000 | 3.261677000  |
| 6                             | 4.015749000  | -0.000345000 | 1.608936000  |
| 1                             | 4.895072000  | -0.000447000 | 2.246506000  |
| 6                             | 4.160456000  | 0.000605000  | 0.221959000  |
| 1                             | 5.148937000  | 0.001282000  | -0.228203000 |
| 6                             | 3.027410000  | 0.000705000  | -0.594901000 |
| 1                             | 3.130550000  | 0.001447000  | -1.676897000 |
| 1                             | -4.430909000 | 0.000290000  | 1.979095000  |
| 1                             | 0.627158000  | -2.764212000 | -1.368012000 |
| 1                             | 0.627563000  | 2.764698000  | -1.367382000 |
